# Supplementary material for: High throughput screening identifies SOX2 as a super pioneer factor that inhibits DNA methylation maintenance at its binding sites
Source: PubMed Central journal article supplement (PMC8184831; doi:10.1038/s41467-021-23630-x), 2021-06-07
Supplement: 41467_2021_23630_MOESM1_ESM.pdf [file 41467_2021_23630_MOESM1_ESM.pdf]

## **Supplementary information**

**High throughput screening identifies SOX2 as a Super Pioneer Factor that inhibits DNA methylation maintenance at its binding sites.**

Ludovica Vanzan, Hadrien Soldati, Victor Ythier, Santosh Anand, Simon M.G. Braun,  
Nicole Francis, Rabih Murr

**a**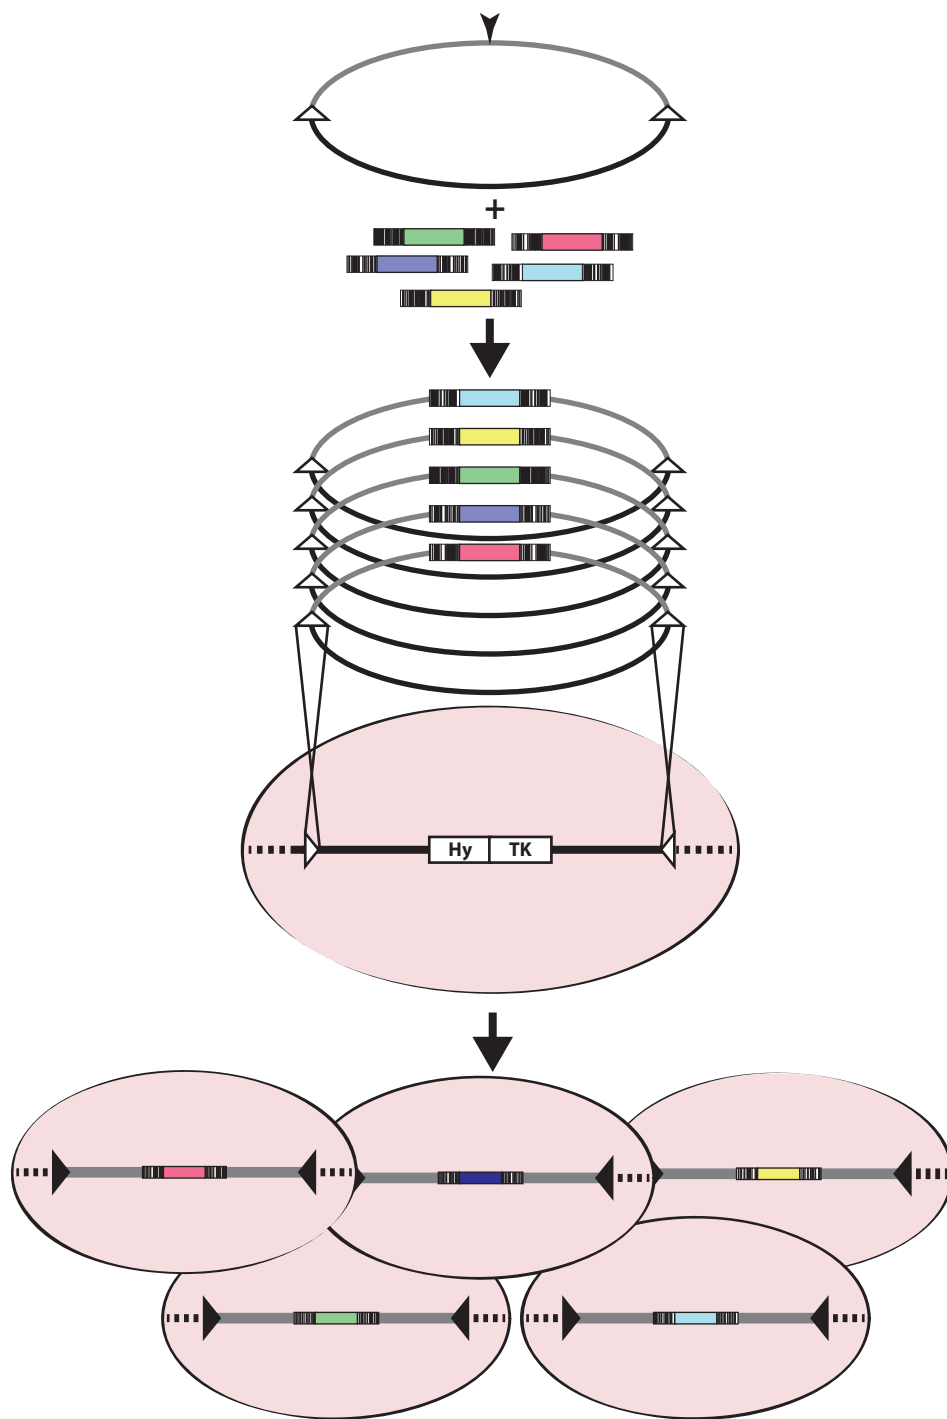**b**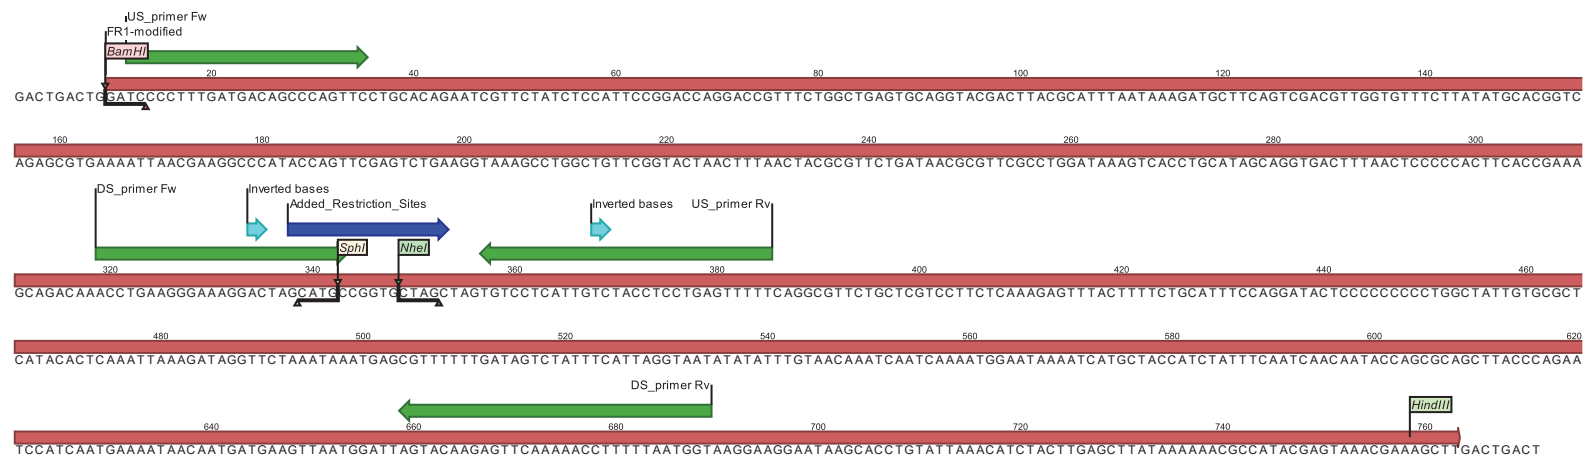**Supplementary Figure 1**

## Supplementary Figure 1. Experimental approach.

(a) Schematic representation of the Hi-TransMet approach. A library of targeting plasmids each containing the same bacterial DNA fragment, (FR1) represented by a grey line, but a different motif (colored rectangles) and barcodes (dashed boxes) and flanked by *LoxP* sites (triangles) were transfected into ESCs containing the RMCE site together with a plasmid expressing CRE recombinase. This leads to the replacement of the selection cassette (Hygromycin/Thymidine Kinase) by the bacterial fragment. Ganciclovir treatment selects the cells that underwent recombination. Genomic DNA is extracted from successfully recombined cells and treated with sodium bisulfite. (b) Sequence of the bacterial fragment FR1 used in this study. Primer sequences for Bisulfite PCR and library preparation are indicated in green. US\_Primer is the upstream primer pair, DS\_Primer is the downstream primer pair (please refer to text for further details). Edits to the original sequence<sup>42</sup> are indicated in dark blue (additions) and light blue (changes of position). The fragment was inserted into the RMCE donor plasmid by directional cloning using the restriction enzymes BamHI and HindIII (flags); motifs were later inserted by directional cloning with SphI and NheI (flags).

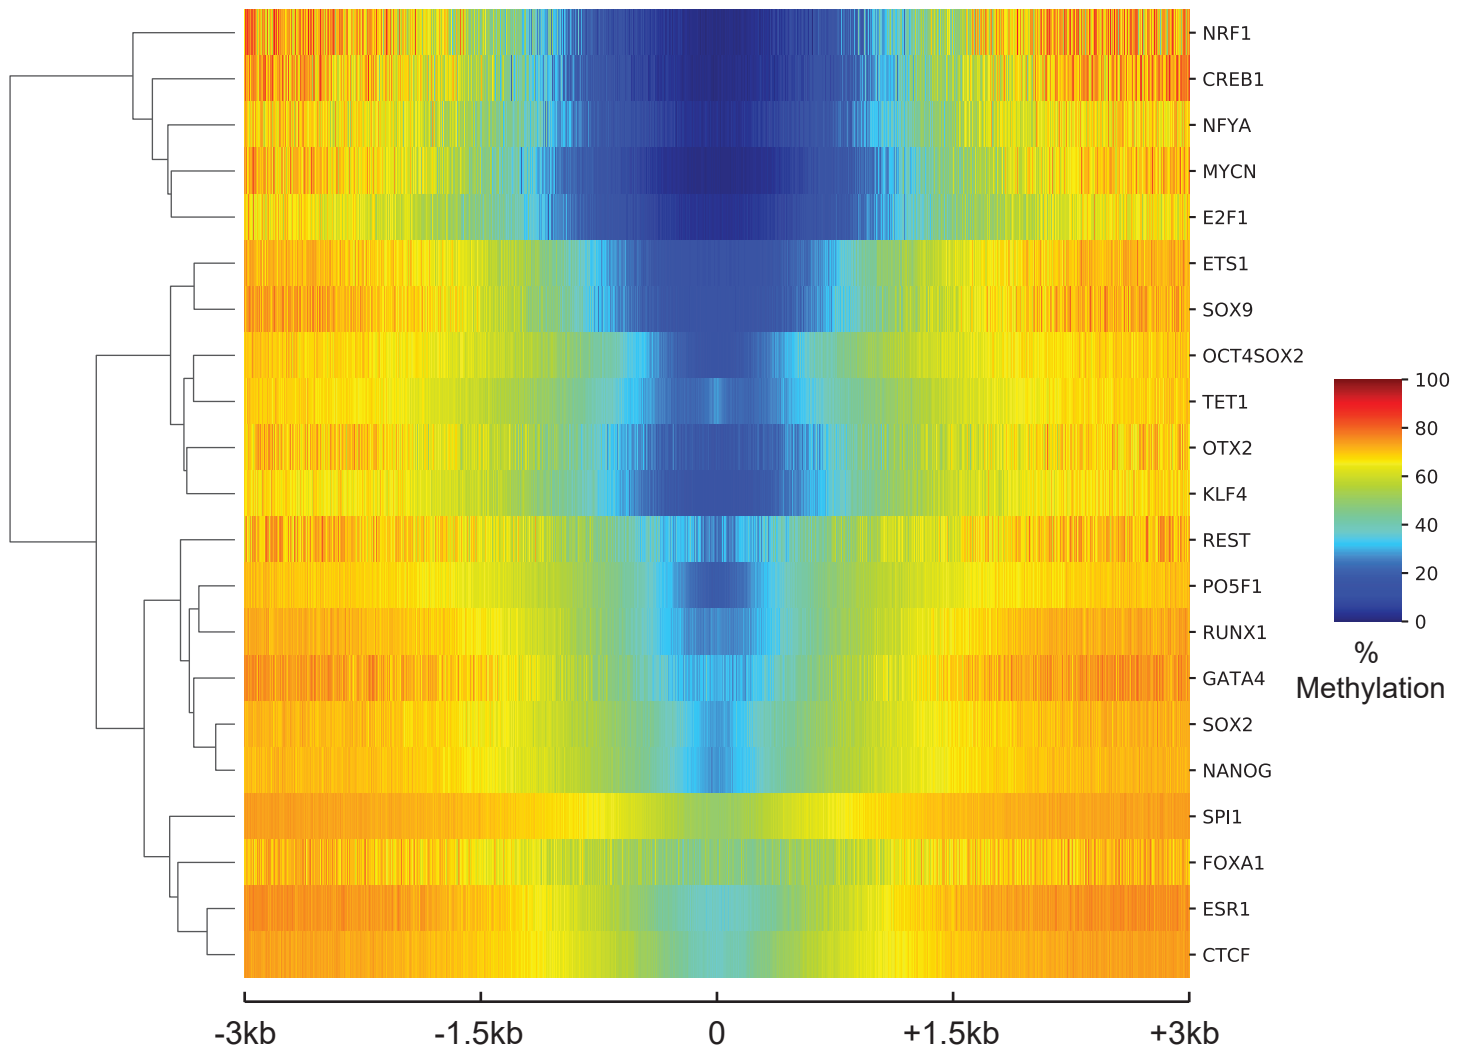

Supplementary Figure 2

**Supplementary Figure 2. Common endogenous PF-binding sites exhibit low methylation levels in ESCs.**

Heat map of methylation levels 3kb around the center of mouse aggregate cistromes, the peaks of routinely identified binding sites for different PFs in several cell types.

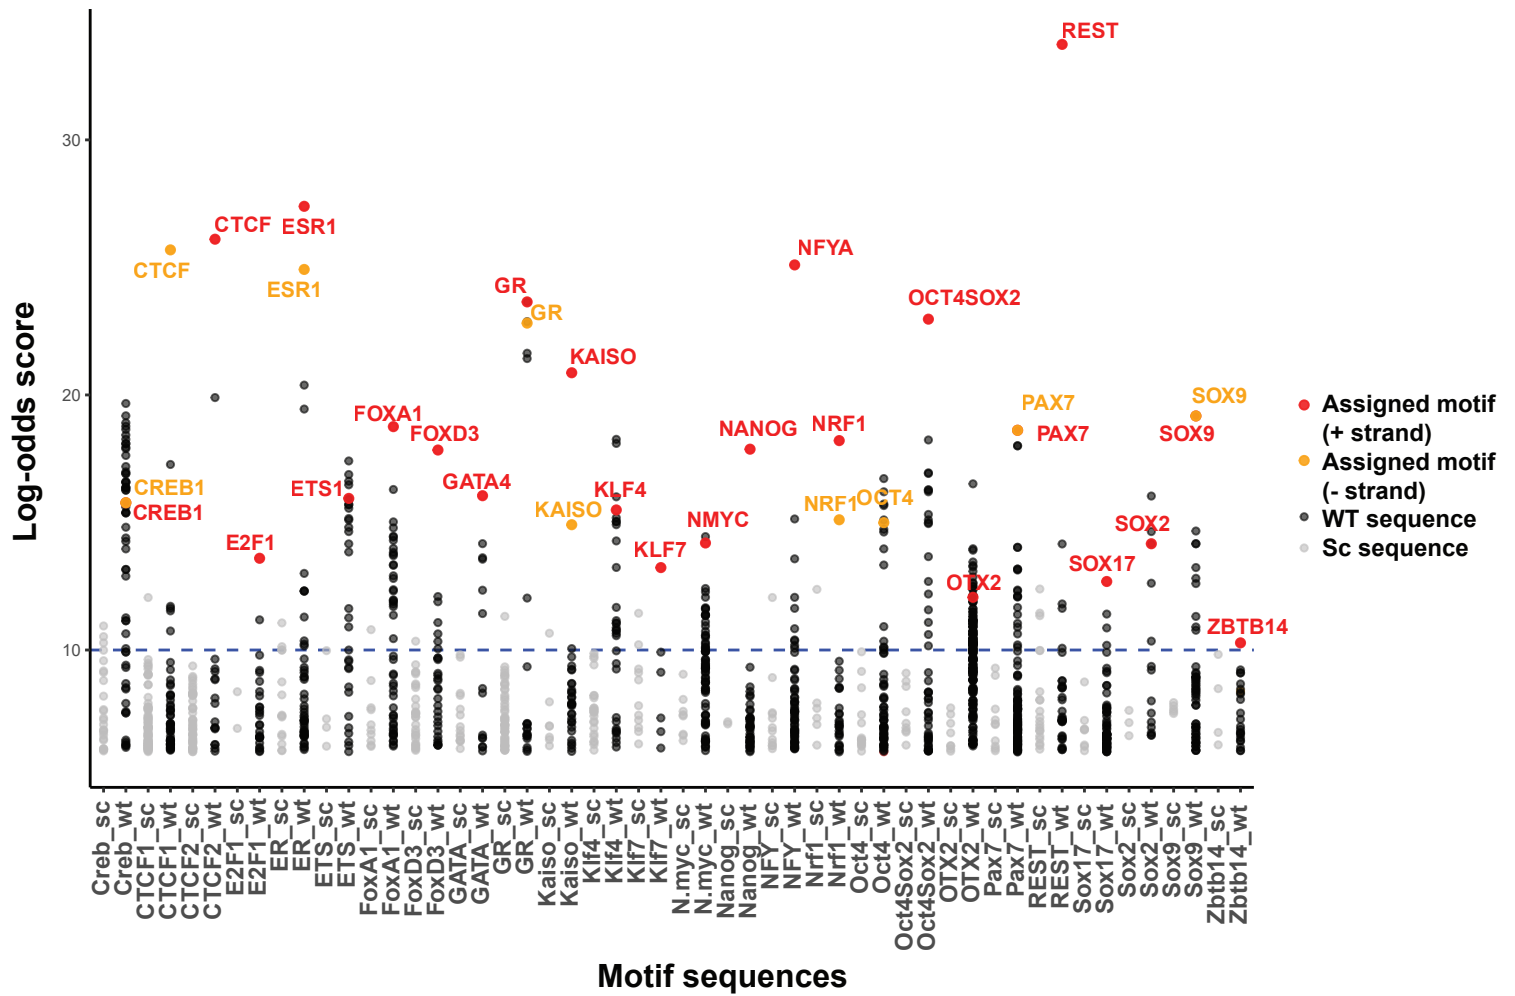

Supplementary Figure 3

**Supplementary Figure 3. *In silico* analysis of different restriction site-barcode-motif combinations.**

Score of transcription factors predicted using HOMER tool for all restriction site-barcode-motif combinations. Black and gray dots are all TFBS predicted for WT and Sc sequences, respectively. TFBSs assigned to WT sequences are represented by red (top strand) and orange (bottom strand) dots.

**a**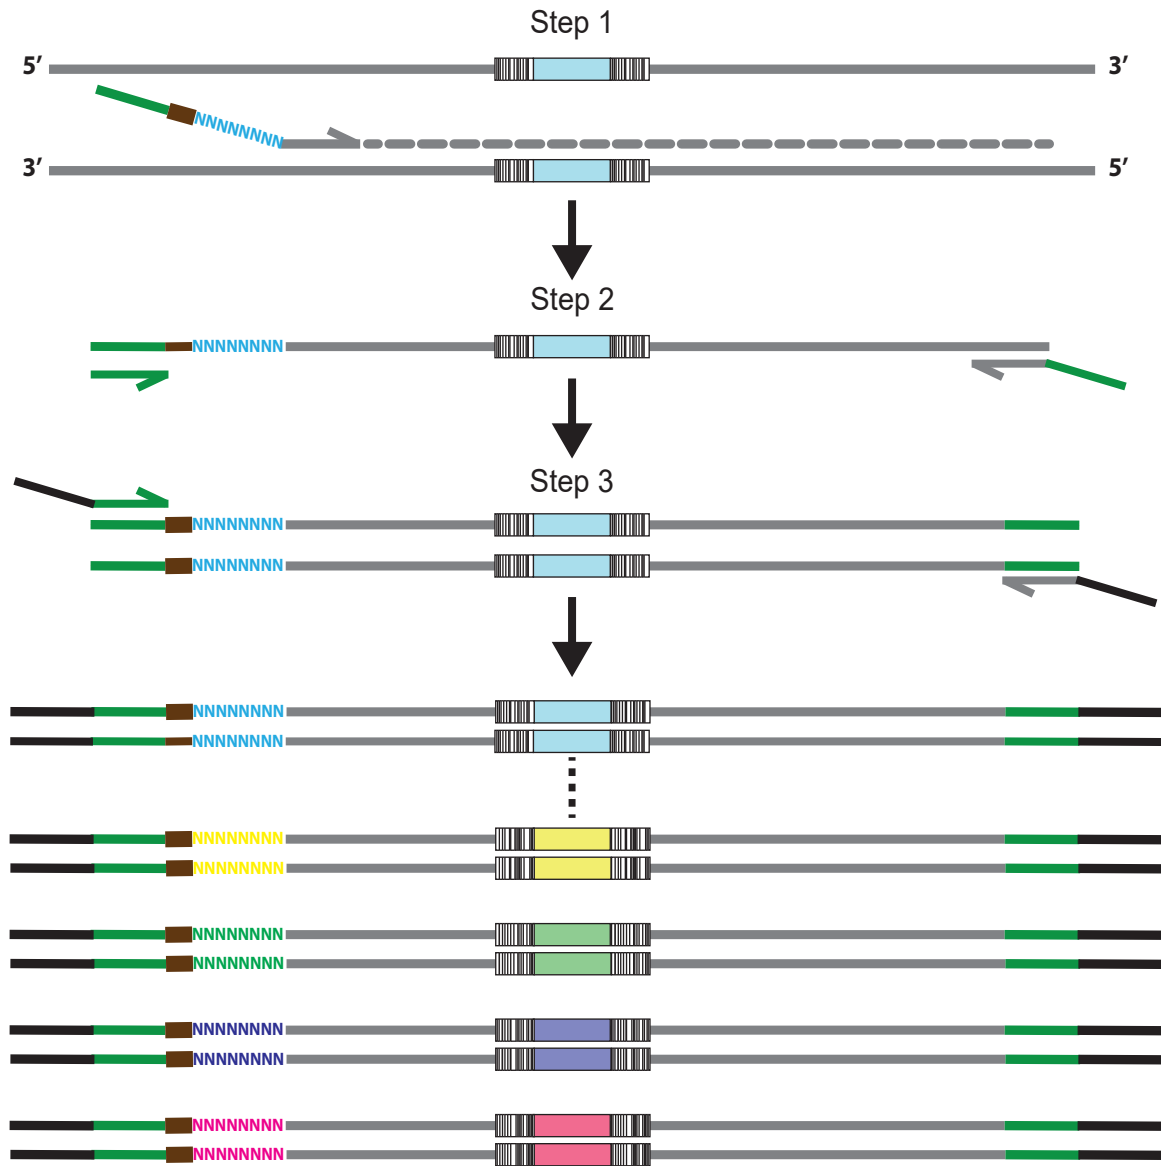**b**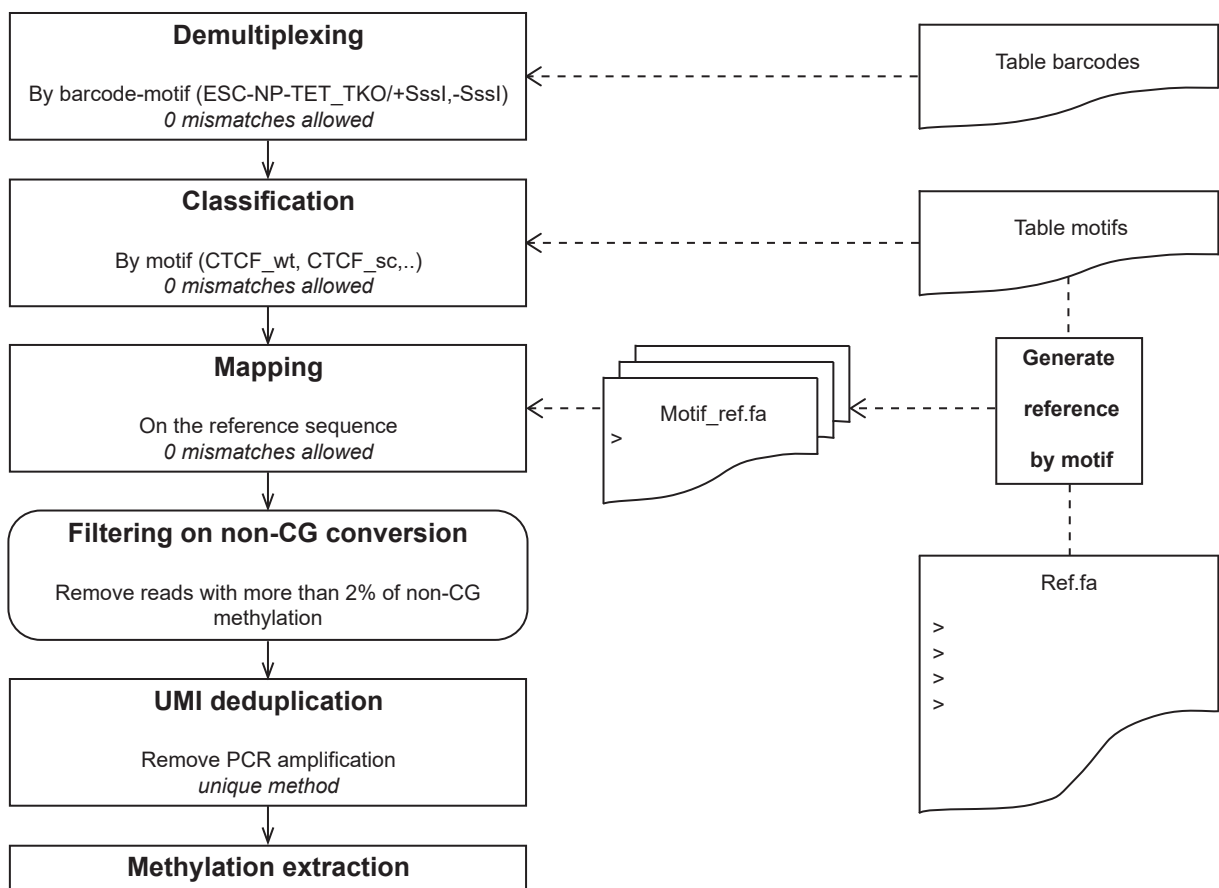



## **Supplementary Figure 4. Hi-TransMet library preparation and molecular barcoding.**

(a) Hi-TransMet library preparation. Step 1, UMI assignment. A target-specific reverse primer, including a UMI tag (colored Ns) and a library barcode (black) is annealed to the bisulfite-converted DNA and the target sequence is extended. Step 2, non-barcoded amplification. A short PCR amplification is performed using forward target-specific primers and a reverse universal primer. Step 3, addition of sequencing adapters by PCR amplification. Unused primers and primer dimers are removed between each step. The region of interest surrounding the motifs is PCR amplified using two sets of universal primers, upstream and downstream of the motifs, covering about 500 bp flanking the binding sites. (b) Overview of the bioinformatic pipeline.

**a**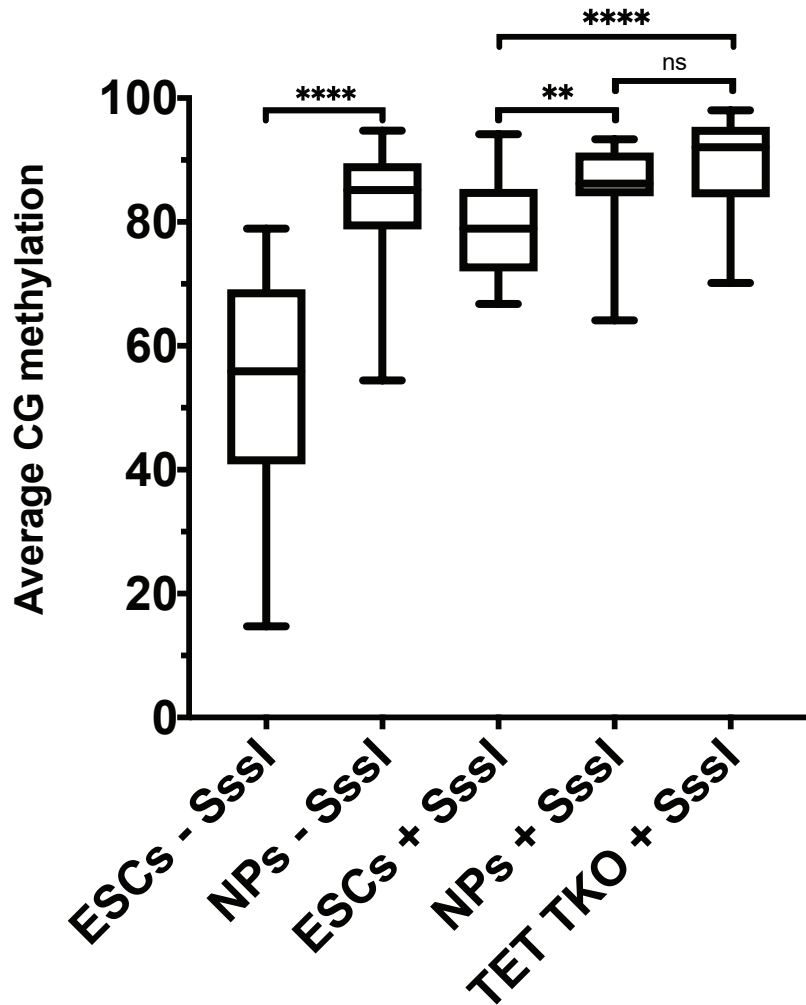**b**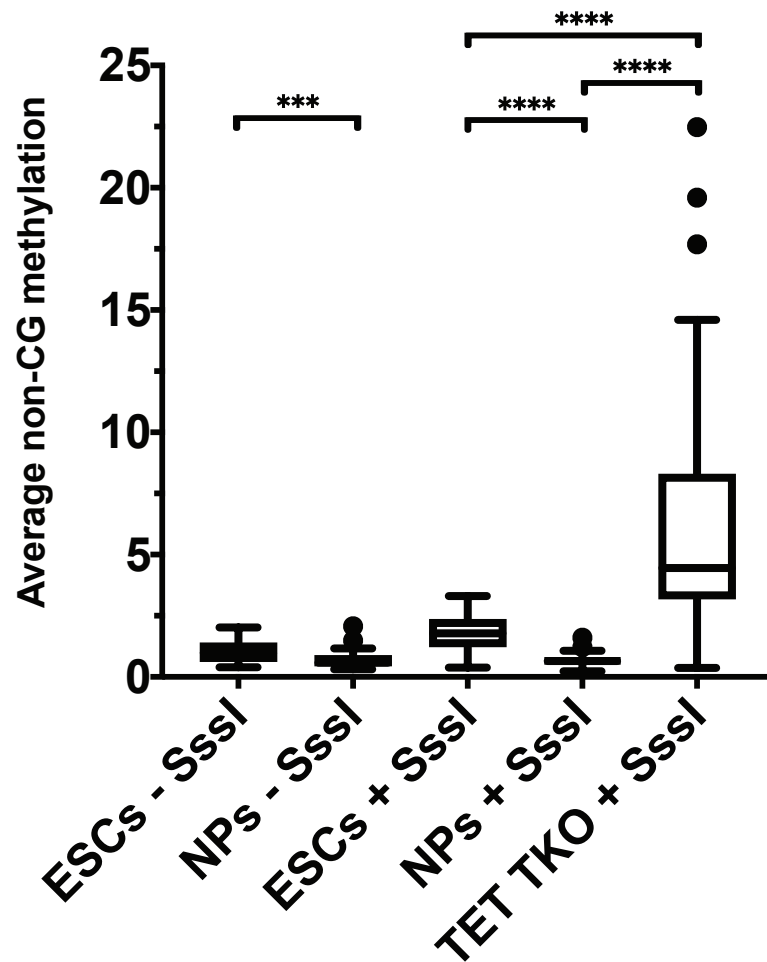

**Supplementary Figure 5. Overall methylation levels on FR1 fragment in WT ESCs, NPs and TET TKO ESCs.**

(a) Mean ratio of CpG methylation in WT ESCs, NPs and TET TKO ESCs measured at FR1 fragments containing Sc motifs (n=26). P-values (two-tailed paired t-test, \*\*p<0.01, \*\*\*\*p<0.0001): NPs/-Sssl vs ESCs/-Sssl: p=1.59E-07; NPs/+Sssl vs ESCs/+Sssl: p=0.0025; TET-TKO/+Sssl vs ESCs/+Sssl: p=1.01E-0.5; TET-TKO/+Sssl vs NPs/+Sssl: p=0.1527. (b) Mean ratio of non CpG methylation (CHG+CHH) in WT ESCs, NPs and TET TKO ESCs measured at FR1 fragments containing Sc motifs (n=26). P-values (two-tailed paired t-test, \*\*\*p<0.001, \*\*\*\*p<0.0001): NPs/-Sssl vs ESCs/-Sssl: p=0.0010; NPs/+Sssl vs ESCs/+Sssl: p=1E-07; TET-TKO/+Sssl vs ESCs/+Sssl: p=0.0002; TET-TKO/+Sssl vs NPs/+Sssl: p=2.65E-05. In both panels (a) and (b) data are represented as box plots where the middle line is the median, the lower and upper hinges correspond to the 25<sup>th</sup> and the 75<sup>th</sup> percentiles, the lower whisker extends from the lower hinge to the smallest value and the upper whisker extends from the upper hinge to the biggest value not bigger than the 75<sup>th</sup> percentile plus 1.5 IQR (inter-quartile range). For all panels, source data are provided as a Source data file.

**a**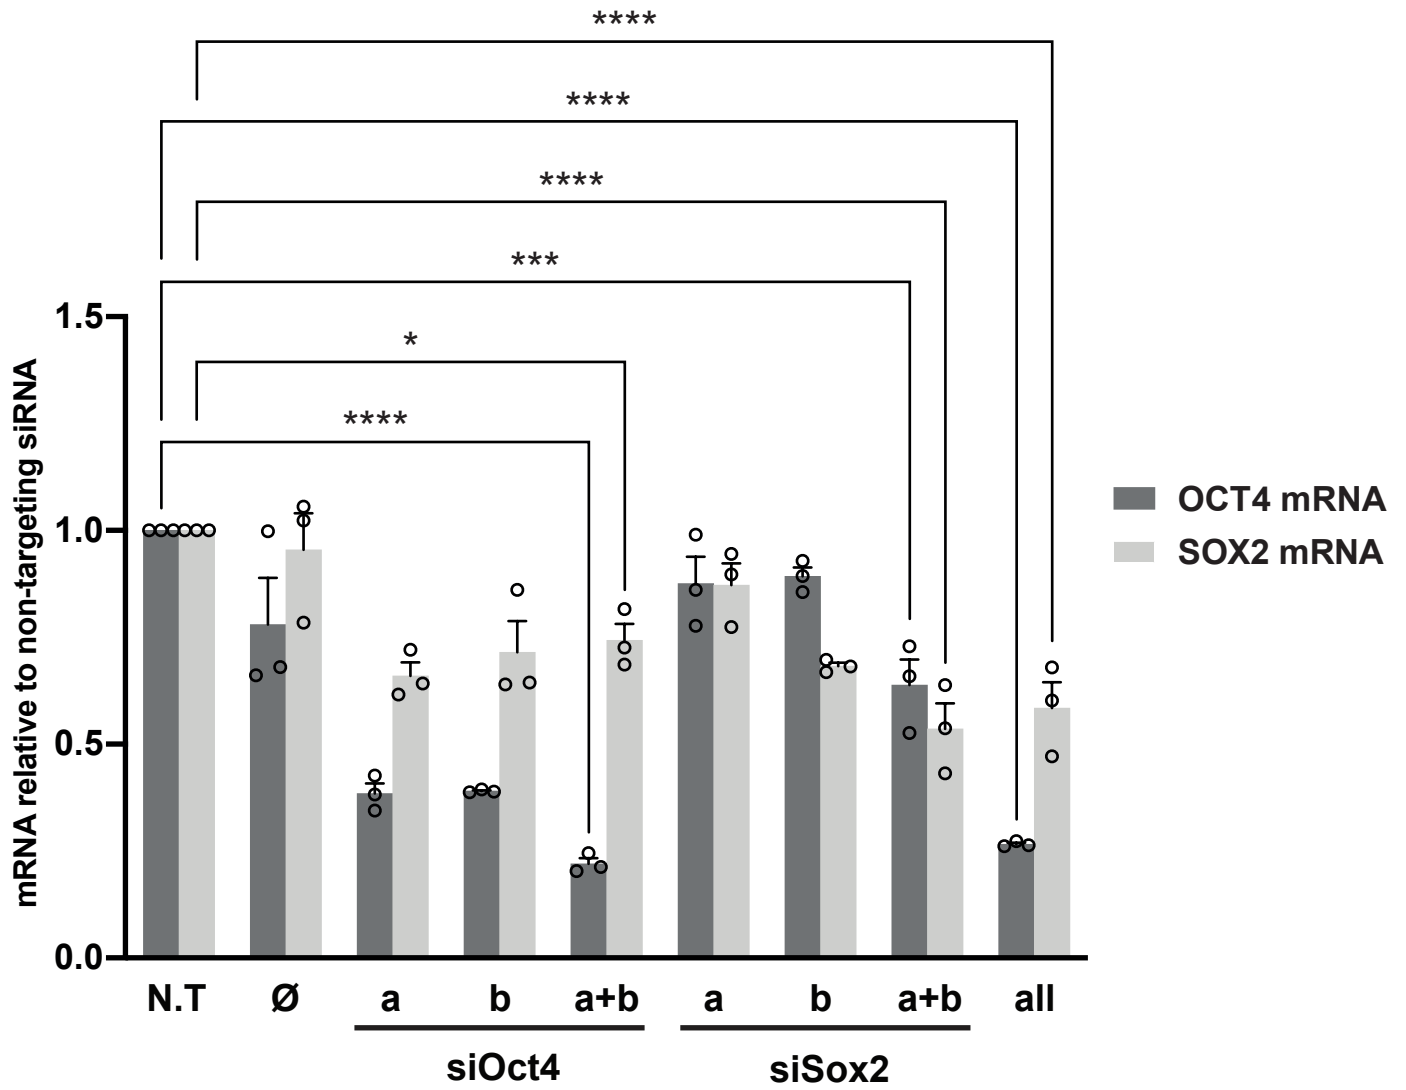**b**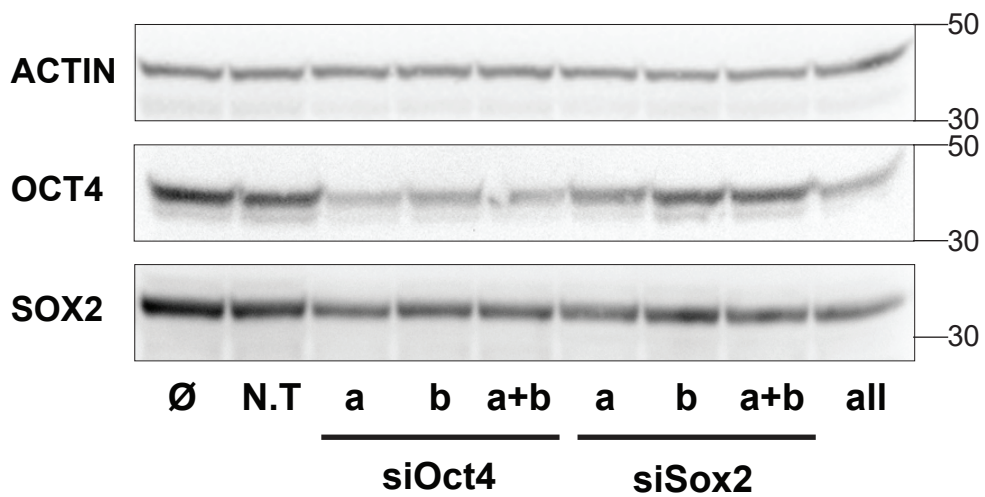

**Supplementary Figure 6. siRNA knockdown of OCT4 and SOX2 in ESCs containing FR1 with WT OCT4SOX2 motif, +Sssl condition.**

**(a)** Reduction of OCT4 and SOX2 mRNA levels normalized to expression of the reference housekeeping gene Snrpd3, 72h post siRNA transfection. Results are presented as mean + SD of n=3 biologically independent replicates. P-values (2-way ANOVA, \*p<0.05, \*\*p<0.01, \*\*\*p<0.001, \*\*\*\*p<0.0001): Oct4mRNA\_siOct4a+b p=1.79E-09, Sox2mRNA\_siOct4a+b p=0.0228, Oct4mRNA\_siSox2a+b p=0.0004, Sox2mRNA\_siSox2a+b p=4.71E-06, Oct4mRNA\_siAll p=9.49E-11, Sox2mRNA\_siAll p=3.60E-05. **(b)** Reduction of OCT4 and SOX2 protein levels, 72h post siRNA transfection. Western blot was performed on one of the three biologically independent knockdown experiments. Actin housekeeping gene is used as a loading control "All": siOCT4a+siOCT4b+siSOX2a+siSOX2b. N.T: non targeting siRNA. Ø: non-transfected. For both panels, source data and uncropped blots are provided as a Source Data file.

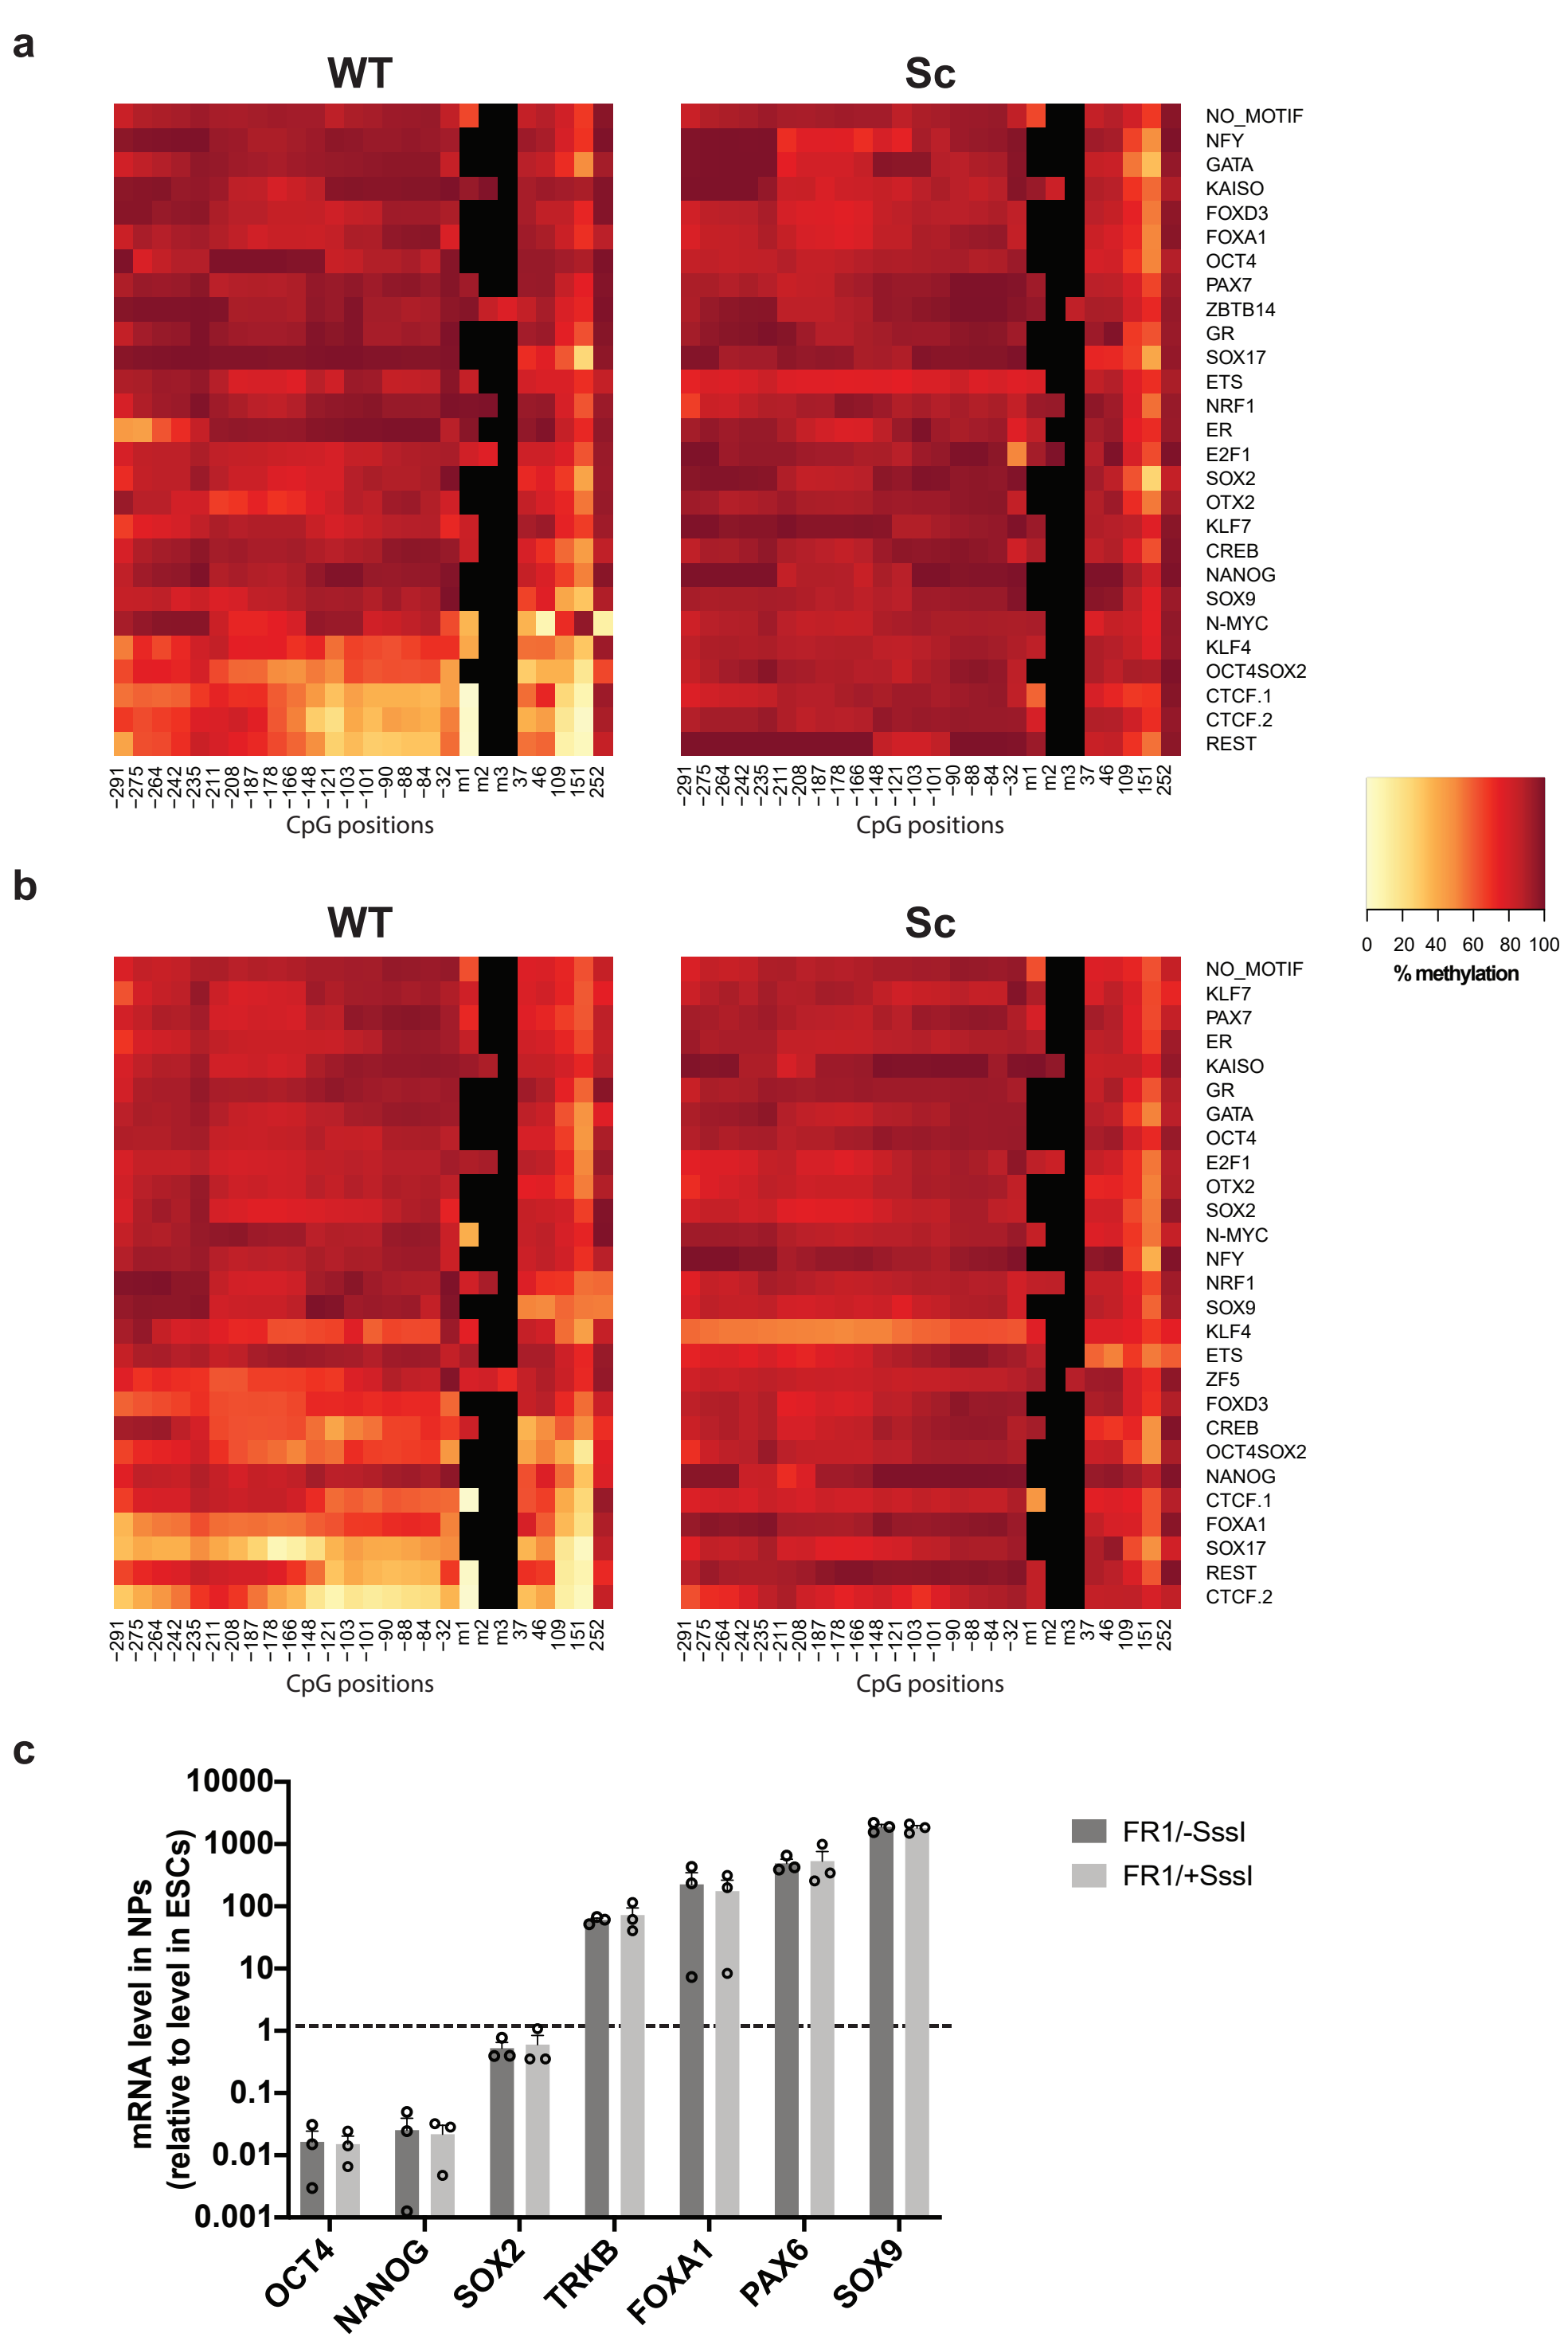

Supplementary Figure 7

### **Supplementary Figure 7. Differentiation into neuronal progenitors.**

(a, b) Heatmaps representing methylation percentages around WT and Sc motifs in the FR1/-Sssl condition (a) and FR1/+Sssl (b). (c) qPCR validation of NP differentiation by analysis of ESC-specific (Oct4, Nanog and Sox2) and NP-specific markers (FoxA1, Pax6 and Sox9). Data are shown as mean+SEM or n=3 biologically independent experiments. Source data are provided as a Source data file.

**a****ATACseq in OCT4SOX2 ESCs**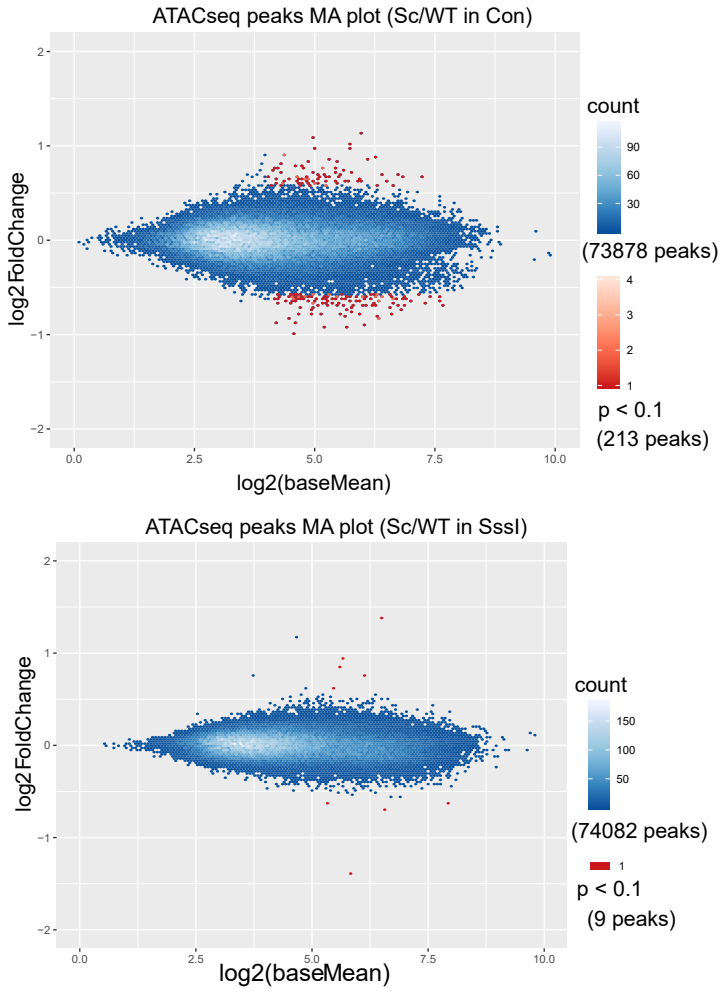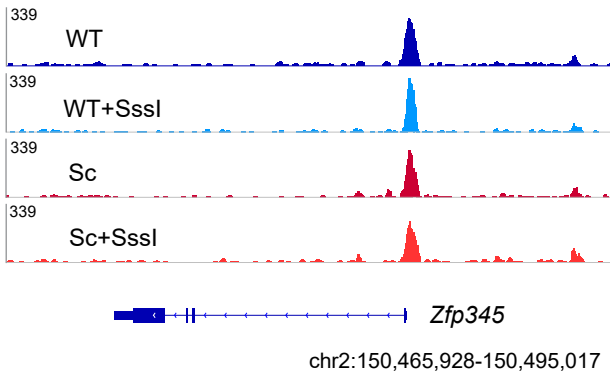**b****ATACseq in CTCF ESCs**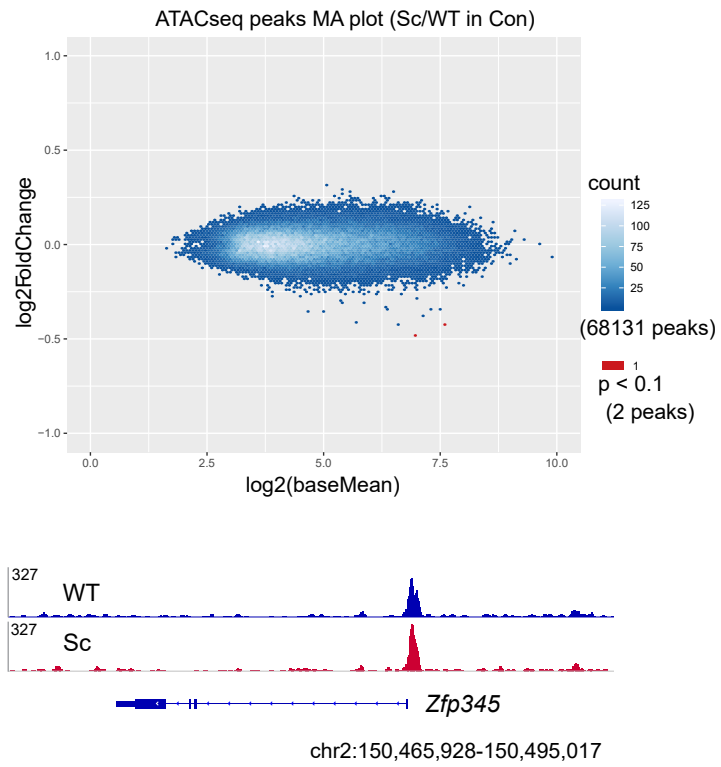



**Supplementary Figure 8. ATAC-Seq in ESCs at OCT4SOX2 and CTCF binding sites in FR1.**

(a,b) MA plots following analysis of differential ATAC-seq peaks using the DESeq2 analysis software. As expected, there are very few changes in chromatin accessibility across the genome of the (a) FR1 OCT4SOX2 ESCs (WT and Sc, +/- Sssl) and (b) FR1 CTCF ESCs (WT and Sc, -Sssl). Genome browser tracks (mean values across replicates) of the ATAC-seq data for all conditions at the *Zfp345* locus.

**a**

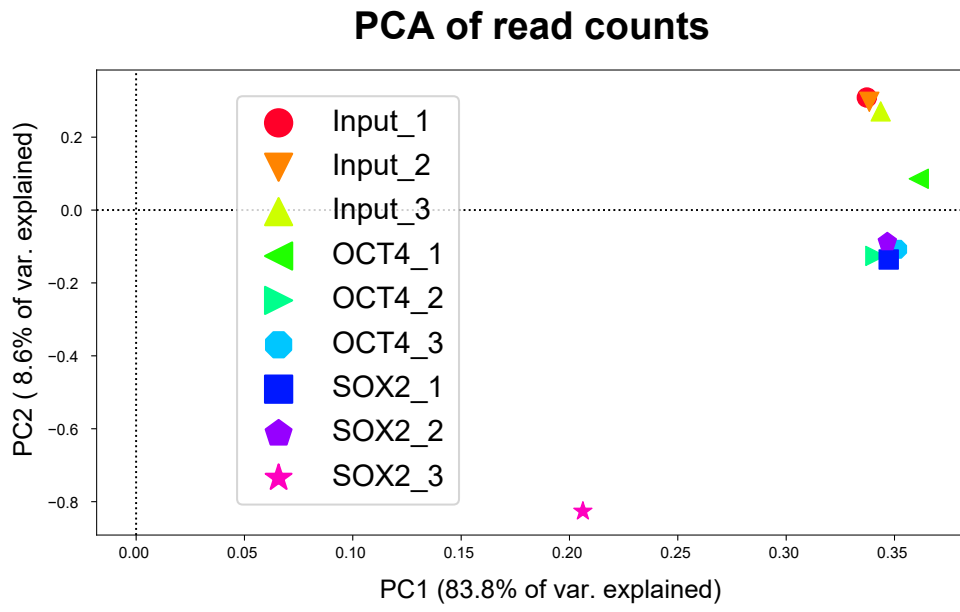

**b**

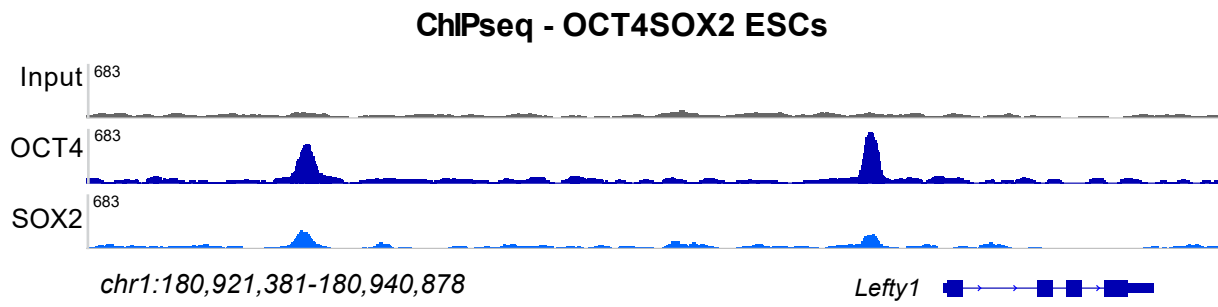

**Supplementary Figure 9. ChIP-Seq for OCT4 and SOX2 in ESCs.**

(a) PCA analysis of the Oct4 and Sox2 ChIPseq data from FR1 OCT4SOX2 ESCs.

As shown, the third replicate of the Sox2 ChIP is of poor quality and was therefore not used for the subsequent analysis of TF binding at the FR1 locus. (b)

Representative genome browser tracks (mean values across replicates) of the ChIPseq data across the *Lefty1* locus.

**a**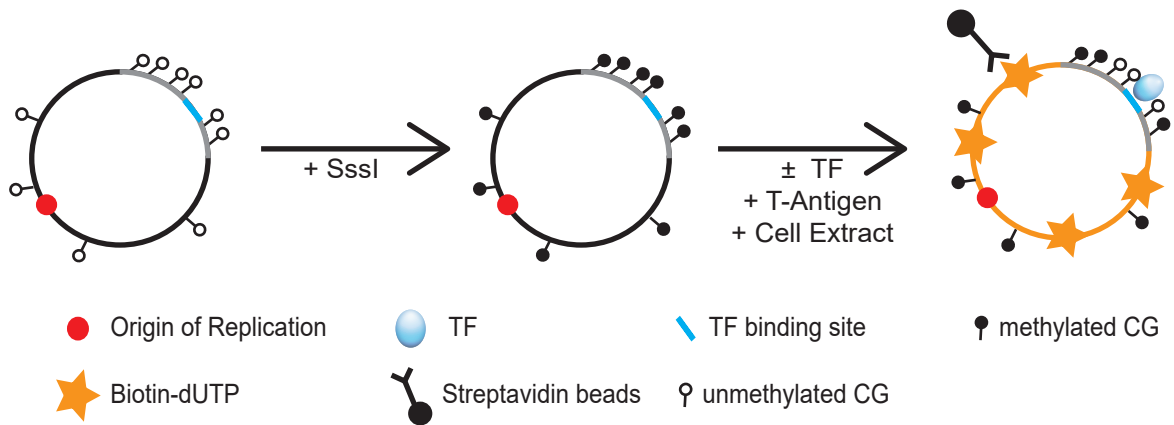**b**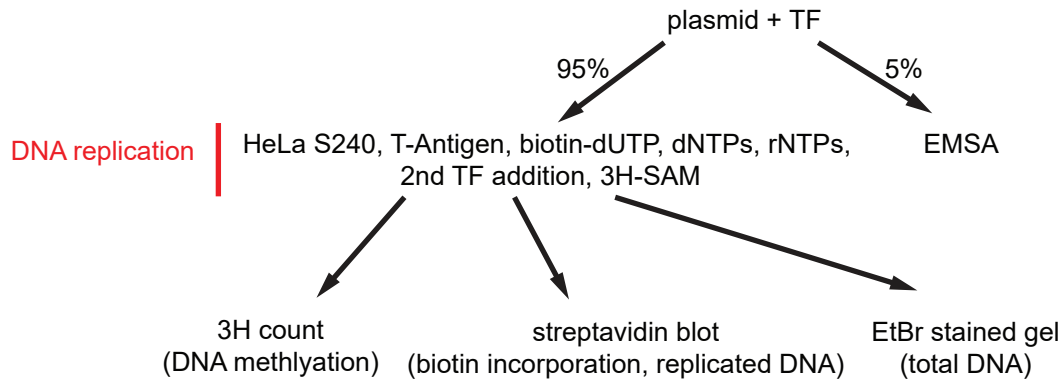**c**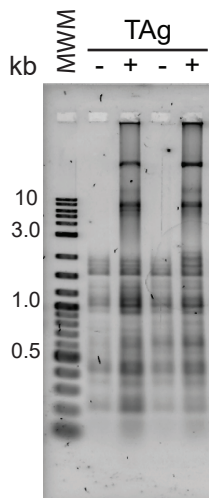**d**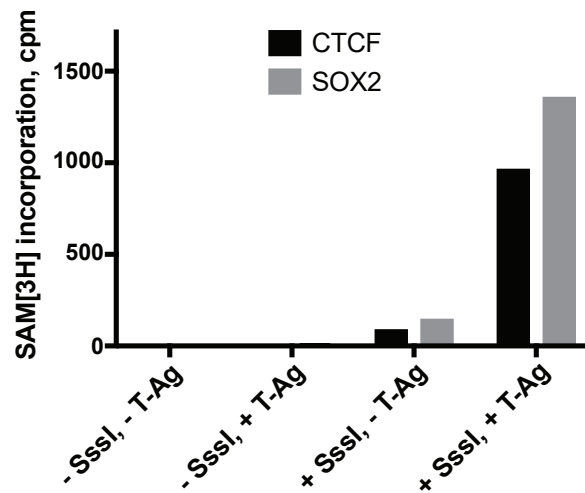**e**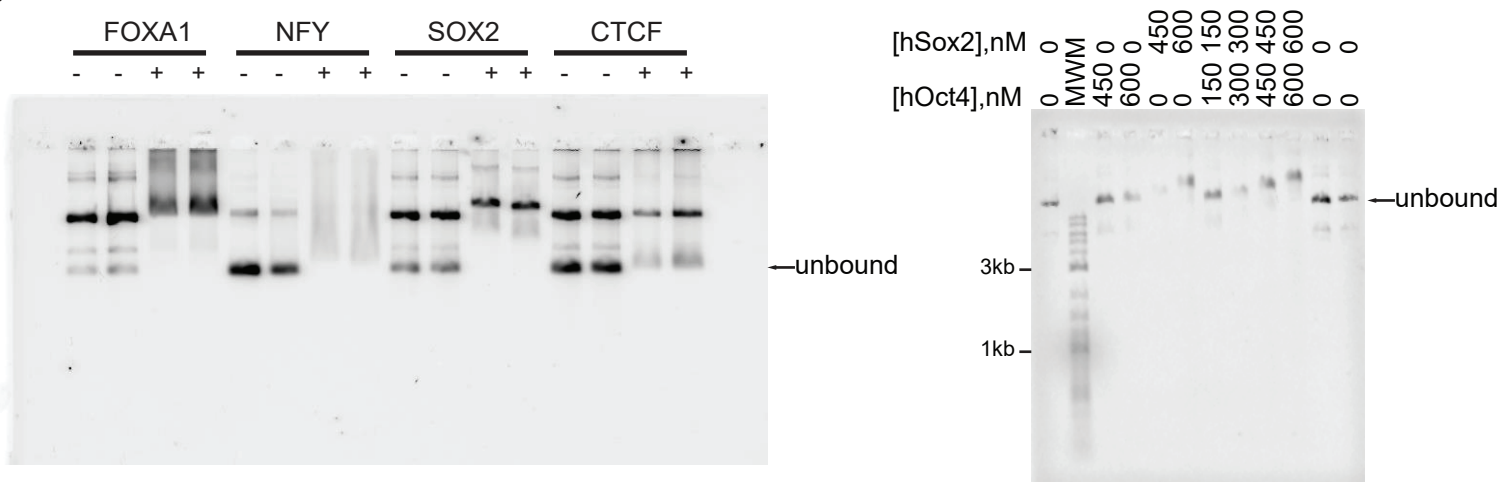

### Supplementary Figure 10. *In vitro* replication assay.

(a-b) Schematic representation of the *in vitro* replication assay. FR1 or FR2 bacterial DNA fragments are cloned into the SV40 replication vector containing an origin of replication. The resulting plasmid is *in vitro* methylated using the SssI methyltransferase. Plasmid is then incubated with the TF of interest, then replication occurs in the presence of HeLa S240 cell extract, T-Antigen, biotin-dUTP, dNTPs, rNTPs, TF and 3H-SAM. Biotinylated, replicated DNA is purified by immunoprecipitation using streptavidin beads. (c) DpnI digestion of the non-replicated plasmid is used to assess the completion of the replication reaction in all DNA replication experiments. (d) DNA methylation is maintained during *in vitro* DNA replication. –SssI and +SssI plasmids were incubated in HeLa extracts in the presence of SAM[3H] and in the presence or absence of T-Ag. DNA was purified and SAM[3H] measured by scintillation counting. Graph shows CPM - background. (e) 5% of the reaction is used to assess TF binding by EMSA with titrations covering a broad concentration range for all DNA replication experiments. In all cases, binding was confirmed. For all panels, source data are provided as a Source data file.

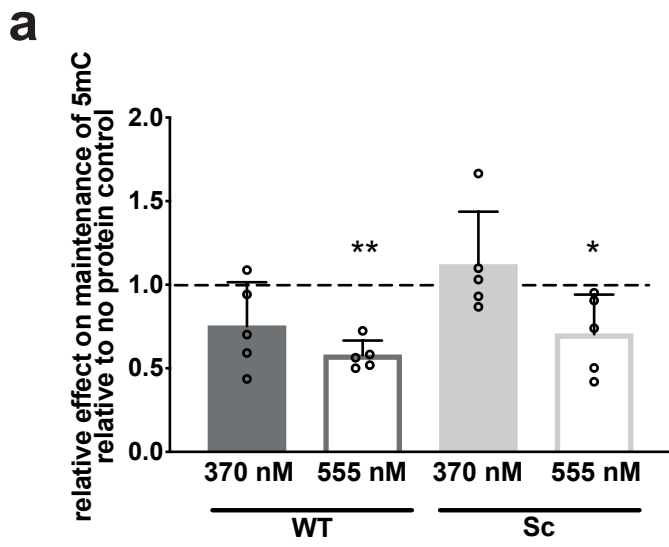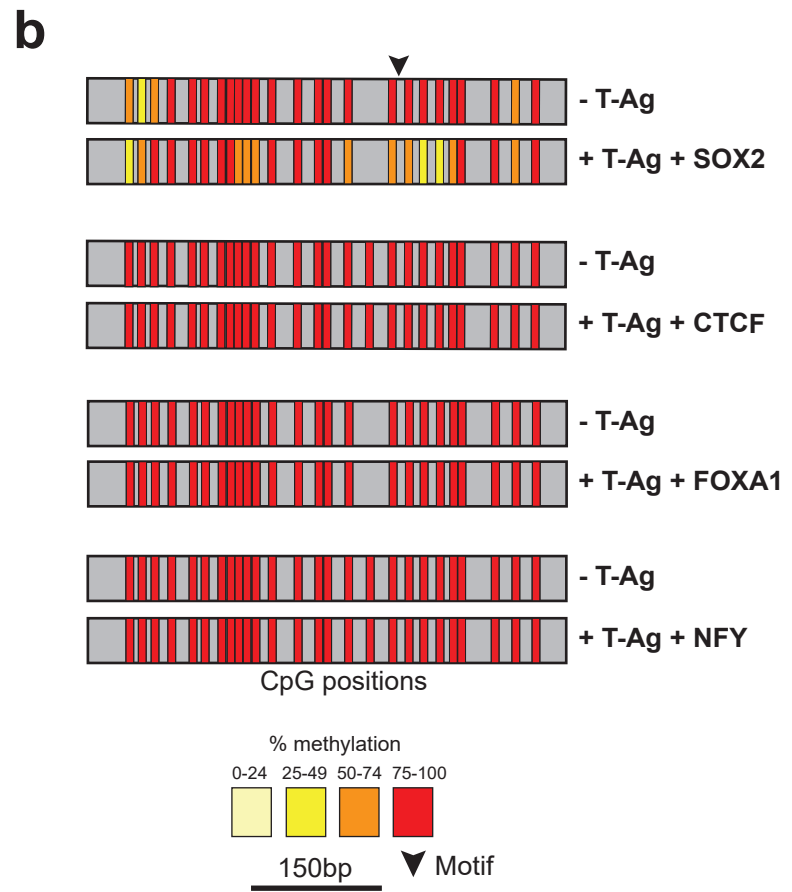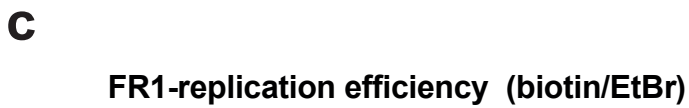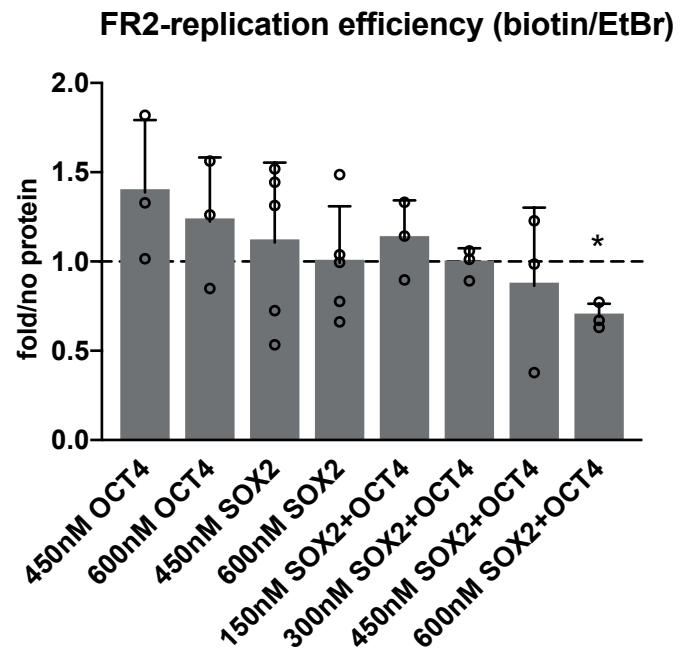

## Supplementary Figure 11. SOX2 inhibits DNMT1-dependent maintenance of DNA methylation during replication

(a) *In vitro* replication assay to assess the effect of SOX2 binding to FR1 containing SOX2-only motif on the DNMT1-dependent maintenance of DNA methylation during replication. Methylation levels following replication are measured based on the integration of radioactively labeled methyl group during replication. Results are presented as mean + SD of n=5 biological replicates and analyzed as radioactive signal in the presence of SOX2 relative to the signal in absence of SOX2. P values (one sample t-test, \*p<0.05, \*\*p<0.001): SOX2\_WT 370nM p=0.1026, 555nM p=0.0004; SOX2\_Sc 370nM p=0.4521, 555nM=0.0491, two-tailed unpaired t-test. (b) Bisulfite Sanger sequencing analysis of the FR1 containing SOX2, CTCF, FOXA1 or NFY motif in absence or presence of replication (+/- T-Ag) and the PF (+/- PF, 555nM). Vertical bars correspond to CpG positions, and the color code corresponds to the percentage of methylation calculated for each CpG with a minimum coverage of 10 bisulfite reads. (c) Replication efficiency of FR1 and FR2 probes containing OCT4SOX2 motif as measured by the ratio of replicated DNA (biotin) to total DNA extracted from the reaction (EtBr). Results are presented as mean + SD of n=5 (hSOX2 samples) or n=3 biologically independent replicates (hOCT4 and hOCT4+hSOX2 samples). The small decrease in DNA replication with high concentrations of TFs was not statistically significant. Because we calculate the ratio of incorporated SAM[3H] (DNA methylation) to incorporated biotin-dUTP (DNA replication), these differences will not affect the interpretation (**figure 7**) P-values (two-tailed unpaired t-test, \*\*p<0.01, \*p<0.05): FR1\_OCT4+SOX2 600nM: 0.0063, FR2\_OCT4+SOX2 600nM: 0.0179. For all panels, source data are provided as a Source data file.

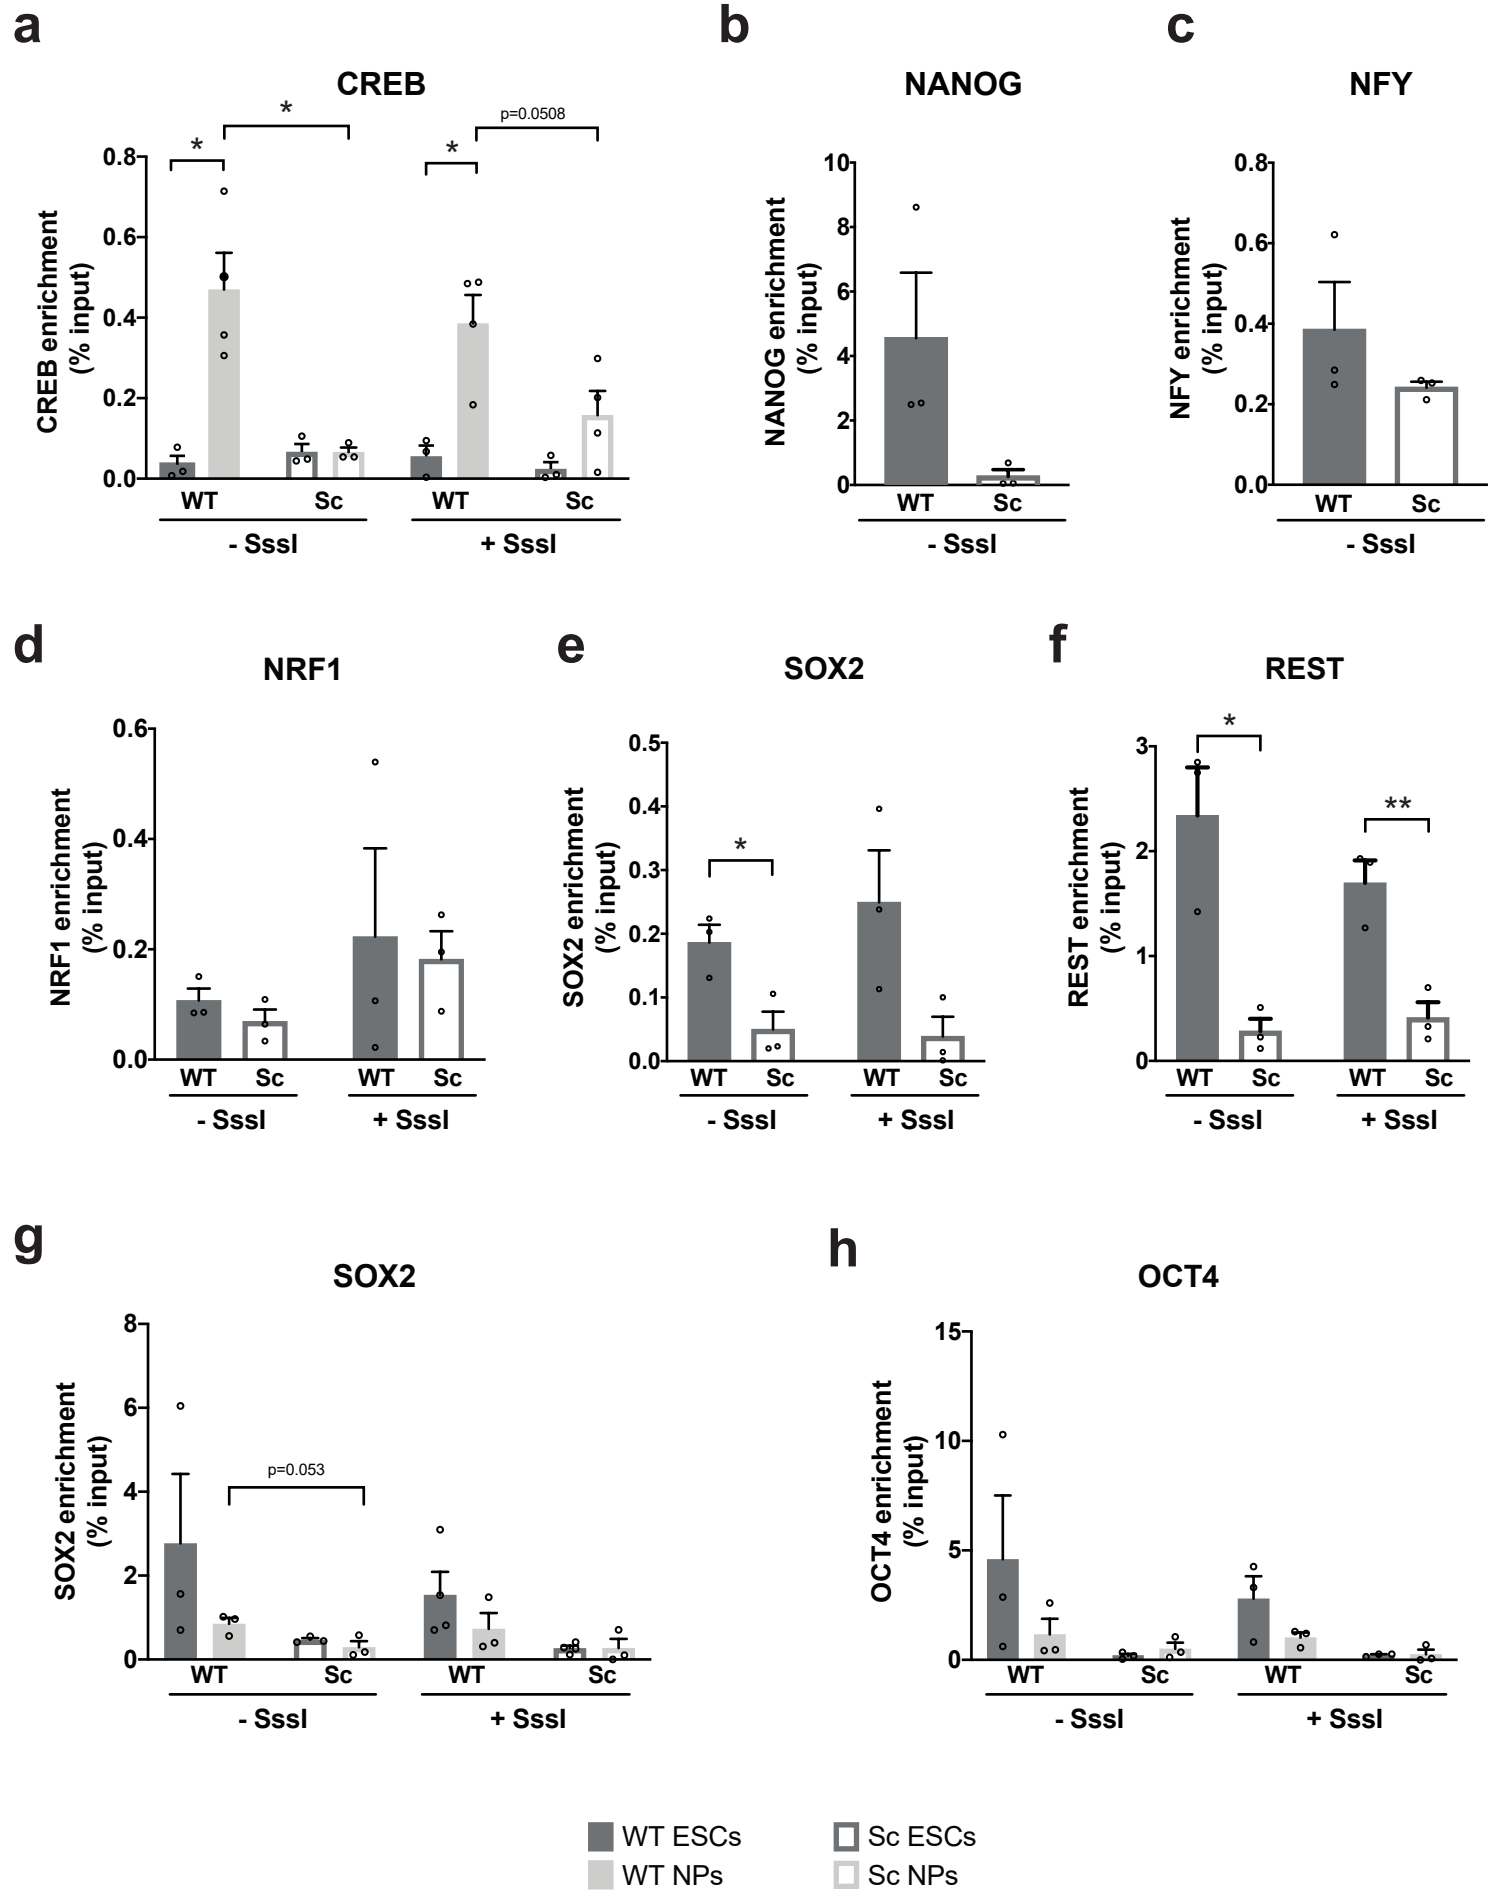

Supplementary Figure 12



## Supplementary Figure 12. CHIP validation of PF binding

(a-f) Chromatin immunoprecipitation (ChIP) to validate CREB (a), NANOG (b), NFY (c), NRF1 (d), SOX2 (e) and REST (f) binding in ESCs and NPs. ESCs containing FR1 and individual motifs were isolated from the pool of transfected cells. When indicated, ESCs were differentiated into NPs. Results are shown as mean + SEM of n=4 (CREB\_NP\_WT/ $\pm$ Sssl, CREB\_NP\_Sc/-Sssl) or n=3 (all other conditions) biologically independent replicates. Binding of selected TFs at their motifs in the FR1 fragment is indicated as % input, that is, the enrichment of IP signal (normalized over input signal) at a selected locus. Enrichment at WT sites is estimated relative to their corresponding Sc site. In most cases, enrichment at WT motif is higher than at Sc ones. Moreover, enrichment at CREB WT motif is higher in NPs than in ESCs. P-values (two-tailed unpaired t-test): CREB\_WT\_NPs/-Sssl vs Sc\_NPs/-Sssl p=0.013; CREB\_WT\_ESCs/-Sssl vs WT\_NPs/-Sssl p=0.01; CREB\_WT\_ESCs/+Sssl vs WT\_NPs/+Sssl p=0.013; SOX2\_WT/-Sssl vs SOX2\_Sc/-Sssl p=0.026; REST\_WT\_ESCs/-Sssl vs Sc\_ESCs /-Sssl p=0.012; REST\_WT\_ESCs/+Sssl vs Sc\_ESCs/+Sssl p=0.008. (g-h) SOX2 (g) and OCT4 (h) ChIP in ESCs and NPs containing the OCT4SOX2 motif. Results are shown as mean + SEM of n=4 (SOX2\_ESCs\_OCT4SOX2\_WT/+Sssl and SOX2\_ESCs\_OCT4SOX2\_Sc/+Sssl) or n=3 (all other conditions) biologically independent replicates. Binding of selected TFs at their motifs in the FR1 fragment is indicated as % input, that is, the enrichment of IP signal (normalized over input signal) at a selected locus. Enrichment at WT sites is estimated relative to their corresponding Sc site, and enrichment in ESCs is estimated relative to enrichment in NPs. For all panels, source data are provided as a Source data file.

## Supplementary Tables

### **Supplementary Table 1. List of PFs selected for RMCE screening.** DNA binding

domains are reported as indicated in the Human TFs database

(<http://humantfs.cabr.utoronto.ca/>)<sup>103</sup>. For each factor, the main references for:

pioneering activity; sensitivity or binding to methylated DNA; suspected DNA

demethylation capacity and/or suspected or proven interactions with TETs and

DNMTs are indicated.

| PF     | DNA Binding Domain          | Pioneering Activity | DNA methylation sensitivity                                  | Suspected DNA demethylation capacity                                                            |
|--------|-----------------------------|---------------------|--------------------------------------------------------------|-------------------------------------------------------------------------------------------------|
| CTCF   | C2H2 Zinc Finger            | 104                 | Binds 5mC <sup>14,51,105</sup>                               | Yes <sup>51,105</sup><br>Interacts with TET <sup>47</sup><br>Interacts with DNMT1 <sup>46</sup> |
| KAISO  | C2H2 Zinc Finger            | 104                 | Binds 5mC <sup>11,33,106</sup>                               |                                                                                                 |
| KLF4   | C2H2 Zinc Finger            | 12,28,40,44,73      | Binds 5mC <sup>10,11,33</sup>                                | Yes <sup>44</sup>                                                                               |
| KLF7   | C2H2 Zinc Finger            | 104                 |                                                              |                                                                                                 |
| REST   | C2H2 Zinc Finger            |                     | Binds 5mC <sup>14</sup>                                      | Yes <sup>14,18</sup><br>Interacts with TET3 <sup>107</sup>                                      |
| ZBTB14 | C2H2 Zinc Finger            | 104                 | Binds C <sup>106</sup>                                       |                                                                                                 |
| ER     | Zinc Finger (NHR type)      | 108                 | Binds 5mC <sup>11</sup>                                      | Yes <sup>109</sup>                                                                              |
| GR     | Zinc Finger (NHR type)      | 108                 |                                                              | Yes <sup>110</sup>                                                                              |
| GATA   | Zinc Finger (GATA type)     | 4,111,112           | Binds 5mC <sup>10,113</sup>                                  | Yes <sup>113,114</sup>                                                                          |
| NANOG  | Homeodomain                 | 20,115              |                                                              | Yes <sup>20</sup><br>No <sup>114</sup><br>Interacts with TET <sup>45</sup>                      |
| OTX2   | Homeodomain                 | 20,116              |                                                              | Yes <sup>20</sup>                                                                               |
| OCT4   | Homeodomain + POU           | 12,28,40,73         | Binds 5mC <sup>11</sup>                                      | No <sup>114</sup>                                                                               |
| PAX7   | Homeodomain + Paired box    | 77,117,118          | Binds 5mC <sup>11</sup>                                      | Yes <sup>77</sup>                                                                               |
| SOX2   | HMG/SOX                     | 12,28,40,73,119     |                                                              | No <sup>114</sup>                                                                               |
| SOX9   | HMG/SOX                     | 120                 |                                                              |                                                                                                 |
| SOX17  | HMG/SOX                     |                     |                                                              | Yes <sup>20</sup>                                                                               |
| ETS    | ETS                         | 104                 | Binds C <sup>11,113,121</sup>                                |                                                                                                 |
| FOXA1  | Forkhead (helix-turn-helix) | 3,4,122             | Binds 5mC <sup>106</sup>                                     | Yes <sup>60,123</sup><br>Interacts with TET1 <sup>58</sup>                                      |
| FOXD3  | Forkhead (helix-turn-helix) | 61,124              |                                                              | Yes <sup>61</sup>                                                                               |
| CREB   | Other (bZip)                | 104                 | Binds C <sup>11,33,66,67</sup>                               |                                                                                                 |
| E2F1   | Other (E2F_TDP)             | 104                 | Binds C <sup>11,106,125,126</sup><br>Binds 5mC <sup>10</sup> | Interacts with DNMT1 <sup>127</sup>                                                             |

|      |                  |                |                                                        |                   |
|------|------------------|----------------|--------------------------------------------------------|-------------------|
| NFY  | Other (CBF/NF-Y) | <sup>104</sup> | Binds C <sup>11</sup>                                  |                   |
| NMYC | Other (bHLH)     |                | Binds C <sup>18,128</sup>                              | No <sup>113</sup> |
| NRF1 | Other (unknown)  | <sup>104</sup> | Binds C <sup>18,33</sup><br>Binds 5mC <sup>10,33</sup> | No <sup>18</sup>  |

**Supplementary Table 2. List of WT and Sc PF motifs and barcodes.**

| PF            | Database ID                  | Experimental binding evidence               | Main publications | WT motif                 | WT barcode | Sc motif                 | Sc barcode |
|---------------|------------------------------|---------------------------------------------|-------------------|--------------------------|------------|--------------------------|------------|
| CREB          | MA0018_CREB1                 | HT-SELEX;<br>compiled                       | 11,67             | TGACGTCA                 | tagaga     | AATCGGTC                 | aatgta     |
| CTCF_1        | MA0139.1_CTCF_rev            | ChIP-Seq                                    | 14,129            | ATAGCGCCCCCTA<br>GTGGCCA | tgagga     | CCCACGGGTGGCC<br>AACCATT | tgatga     |
| CTCF_2        | MA0139.1_CTCF                |                                             |                   | TGGCCACCAGGGG<br>GCGCTA  | tgagga     | GGCAGGGAGGACC<br>CCGTTC  | tgatga     |
| E2F1          | MA0024.1_E2F1 + Chen<br>2008 | ChIP-Seq                                    | 24                | TTTCGCGC                 | atgtga     | TCGCTTCG                 | aaggag     |
| ER            | MA0112_ESR1                  | ChIP-Seq, HT-<br>SELEX                      | 11,130            | AAGGTCACGGTGA<br>CCTG    | agaagt     | GTAACCTCCGAGTG<br>AGGC   | aataga     |
| ETS           | MA0098.3_ETS1                | HT-SELEX,<br>protein binding<br>microarrays | 131,132           | ACCGGAAGTG               | atgggg     | GCCGAAAGTG               | atggtt     |
| FOXA1         | MA0148.3_FOXA1               | ChIP-Seq, HT-<br>SELEX                      | 11,133            | TCCATGTTTACTT<br>TG      | aaagtg     | TATTGGTCTCTAT<br>TC      | ttgtga     |
| FOXD3         | MA0041.1_Foxd3               | ChIP-Seq<br>(partially),<br>SELEX           | 131,134           | GAATGTTTGTTT             | tgagaa     | ATTAGTTTGTGT             | aagtgt     |
| GATA          | MA0482.1_Gata4               | ChIP-Seq, HT-<br>SELEX                      | 11,135            | TCTTATCTCCC              | agtagg     | CTTCACTTCCT              | tgggat     |
| GR            | MA0113.3_NR3C1               | SELEX                                       | 131               | GGGTACATAATGT<br>TCCC    | atgtta     | CACCTAGAAGTGT<br>GCTT    | atgtgg     |
| KAISO         | MA0527.1_ZBTB33              | ChIP-Seq                                    | 136               | CTCTCGCGAGATC<br>TG      | aatatg     | GTTCGCGGACTC<br>AC       | agaggg     |
| KLF4          | MA0039.2_Klf4                | ChIP-Seq                                    | 24                | TGGGCGGGGC               | tgggag     | GGTCCGGGGG               | tatgtg     |
| KLF7          | UniProbe ID UP00093          | HT-SELEX                                    | 11                | ACGCCC                   | tagtgt     | CCGCAC                   | tttgaa     |
| NANOG         | TRANSFAC M01123              | ChIP-Seq                                    |                   | GGGCCATTTC               | ttaagg     | CCTAGGTCCTG              | tataga     |
| NFY           | MA0060.2_NFYA                | ChIP-Seq                                    | 60                | AGAGTGCTGATTG<br>GTCCA   | aaaaga     | TTGGGAGTACTGG<br>TACAC   | tgtggg     |
| NMYC          | MA0104.3_Mycn                | ChIP-Seq                                    | 51                | GCCACGTG                 | aaaaaa     | CATGCGGC                 | tagtat     |
| NRF1          | MA0506.1_NRF1                | ChIP-Seq                                    | 17                | GCGCCTGCGCA              | agatat     | TCGAGCCCGGC              | tgtatt     |
| OCT4-<br>SOX2 | MA0142.1_Pou5f1:Sox2         | ChIP-Seq                                    | 51                | CTTTGTTATGCAA<br>AT      | aagagt     | ATACTGTGAATCT<br>TT      | tgaag      |
| OTX2          | UniProbe ID UP00267          | PBM, HT-<br>SELEX, ChIP-<br>Seq             | 8,61,62           | TTAATCCC                 | ttttaa     | ATATCCCT                 | tgaaga     |

|                  |                     |          |       |                           |        |                           |         |
|------------------|---------------------|----------|-------|---------------------------|--------|---------------------------|---------|
| POU5F1<br>(OCT4) | MA1115.1_POU5F1     | ChIP-Seq | 15    | ATTTGCAT                  | aatggt | TTTAACTG                  | tgtgag  |
| PAX7             | MA0680.1_PAX7       | HT-SELEX | 53    | TAATCGATTA                | atagga | TATACGATAT                | tggata  |
| REST             | MA0138.2_REST       | ChIP-Seq | 55,63 | TTCAGCACCATGG<br>ACAGCGCC | aaaagt | CAGTTACAGCCCC<br>CAGTCGGA | tgggaa  |
| SOX17            | MA0078.1_Sox17      | EMSA     | 64    | TTCATTGTC                 | tattat | TTTCAGTCT                 | ttgggt  |
| SOX2             | MA0143.3_Sox2       | ChIP-Seq | 15    | CCTTTGTT                  | ttagtg | TCTGTCTT                  | tagaag  |
| SOX9             | Liu 2015            | ChIP-Seq | 65    | ACAAAGGGCCCTT<br>TGT      | ttgtta | GGCTAGTCTCATG<br>CAA      | tagata  |
| ZBTB14           | UniProbe ID UP00065 | PBM      | 66    | GCGCGCG                   | atttaa | CCGGGCG                   | tttgggt |

**Supplementary Table 3. Table summarizing identified PPFs and SPFs in ESCs and NPs.**

|             | <b>ESCs</b> | <b>NPs</b> |
|-------------|-------------|------------|
| <b>PPFs</b> | CTCF        | CTCF       |
|             | REST        | REST       |
|             | KLF4        | KLF4       |
|             | KLF7        | SOX2       |
|             | SOX2        | SOX9       |
|             | SOX9        | N-MYC      |
|             | NRF1        |            |
|             | OTX2        |            |
|             | E2F1        |            |
| <b>SPFs</b> | CTCF        | CTCF       |
|             | REST        | REST       |
|             | KLF4        | SOX2       |
|             | SOX2        | SOX17      |
|             | SOX9        | CREB       |
|             | SOX17       | FOXA1      |
|             | E2F1        | FOXD3      |
|             | N-MYC       |            |
|             | GR          |            |

**Supplementary Table 4. List of primers used in this study.**

| Target                           | Purpose                            | Forward                      | Reverse                         |
|----------------------------------|------------------------------------|------------------------------|---------------------------------|
| FR1 upstream                     | RMCE exchange                      | CCTCTGGGTAAATTTGGAACA        | GCAGAACGCTGAAAACTC              |
| FR1 downstream                   | RMCE exchange                      | CACCGAAAGCAGACAAACCT         | AACGCTGAAAACTCAGGA              |
| RMCE cassette                    | RMCE cassette insertion upstream   | AGCAAAGGTGTTCTCATATGTCA      | CAAGTGGCAGTTTACCGTA             |
| RMCE cassette                    | RMCE cassette insertion downstream | TGCACGTCTTTATCCTGGATT        | GGTTTAGTCTTCTCTGTGCCT           |
| FR1_ChIP                         | qPCR                               | ACCATGAAAGTATCAGTTCAGGC      | GTGTAAGCTCTCAACCTAAGCA          |
| Snrpd3                           | qPCR                               | TCTCGCCTTCGCCTTCTAAC         | GGACTCTCCCGGGCAATTA             |
| OCT4                             | qPCR                               | ATGCCGTGAAGTTGGAGAAG         | GCTTGGCAAACCTGTTCTAGCT          |
| Nanog                            | qPCR                               | TTGCTTACAAGGGTCTGCTACT       | ACTGGTAGAAGAATCAGGGCT           |
| Foxa1                            | qPCR                               | GCATGAGAGCAACGACTGG          | CAGGCCGGAGTTCATGTTG             |
| Sox9                             | qPCR                               | CAGACCAGTACCCGCATCTG         | AAGGGTCTTCTCTCGCTCTC            |
| Trkb                             | qPCR                               | GGCATTCCCGAGGTTGGA           | CTGGTTTGCAATGAGAATTTCCG         |
| Pax6                             | qPCR                               | CACCAGACTCACCTGACACC         | TCACTCCGCTGTGACTGTTT            |
| Sox2                             | qPCR                               | TAGAGCTAGACTCCGGGCGATGA      | TTGCCTTAAACAAGACCACGAAA         |
| FR1 upstream                     | Bisulfite PCR                      | AAAATTTAGGAGGTAGATAATGAGGATA | CCCCTTAATAACAACCCAATTC          |
| FR1 downstream                   | Bisulfite PCR                      | ATTTGAAGGGAAAGGATTAGTATGT    | ACCATTAATAAAAAATTTTAAACTCTTATAC |
| Mm_Snrpd3                        | qRT-PCR                            | TCTCGCCTTCGCCTTCTAAC         | GGACTCTCCCGGGCAATTA             |
| Mm_SOX2 (Chen et al, PNAS, 2006) | qRT-PCR                            | GGCAGCTACAGCATGATGCAGGAGC    | CTGGTCATGGAGTTGTACTGCAGG        |
| Mm_OCT4                          | qRT-PCR                            | ATGCCGTGAAGTTGGAGAAG         | GCTTGGCAAACCTGTTCTAGCT          |
| Intergenic                       | ATAC-qPCR                          | GGACAGACATCTGCCAAGGT         | ATGCCCTCAGCTATCACAC             |
| FR1                              | ATAC-qPCR                          | CACCGAAAGCAGACAAACCTG        | TGTATGAGCGCACAATAGCCA           |



**Supplementary Table 5. Hi-TransMet library preparation primers.** UMI-primers in step 1, where N is random nucleotide and X indicates the barcode sequence.

| Step | Target               | Sequence                                                                               |
|------|----------------------|----------------------------------------------------------------------------------------|
| 1    | FR1                  | AATGTACAGTATTGCGTTTTXXXXXXXXNNNNNNNCCCCTTAATAACAACCCAATTC                              |
| 2    | Upstream Forward     | TTCTTAGCGTATTGGAGTCCAAAATTTAGGAGGTAGATAATGAGGATA                                       |
|      | Downstream Forward   | TTCTTAGCGTATTGGAGTCCATTGAAGGAAAGGATTAGTATGT                                            |
|      | Reverse              | AATGTACAGTATTGCGTTTTG                                                                  |
| 3    | Forward with adapter | CAAGCAGAAGACGGCATAACGAGATACATCGGTGACTGGAGTTCAGACGTGTGCTCTCCGATCTNNNTCTTAGCGTATTGGAGTCC |
|      | Reverse with Adapter | AATGATACGGCGACCACCGAGATCTACACTCTTCCCTACACGACGCTCTCCGATCTGAATGTACAGTATTGCGTTTTG         |
|      |                      | AATGATACGGCGACCACCGAGATCTACACTCTTCCCTACACGACGCTCTCCGATCTTGAATGTACAGTATTGCGTTTTG        |
|      |                      | AATGATACGGCGACCACCGAGATCTACACTCTTCCCTACACGACGCTCTCCGATCTCTGAATGTACAGTATTGCGTTTTG       |
|      |                      | AATGATACGGCGACCACCGAGATCTACACTCTTCCCTACACGACGCTCTCCGATCTAATGTACAGTATTGCGTTTTG          |

## Supplementary references

1. Lambert, S. A. *et al.* The Human Transcription Factors. *Cell* **172**, 650–665 (2018).
2. Sherwood, R. I. *et al.* Discovery of directional and nondirectional pioneer transcription factors by modeling DNase profile magnitude and shape. *Nat. Biotechnol.* **32**, 171–178 (2014).
3. Stadler, M. B. *et al.* DNA-binding factors shape the mouse methylome at distal regulatory regions. *Nature* **480**, 490–495 (2011).
4. Feldmann, A. *et al.* Transcription Factor Occupancy Can Mediate Active Turnover of DNA Methylation at Regulatory Regions. *PLoS Genet.* **9**, e1003994 (2013).
5. Rodriguez, C. *et al.* CTCF is a DNA methylation-sensitive positive regulator of the INK/ARF locus. *Biochem. Biophys. Res. Commun.* **392**, 129–134 (2010).
6. Dubois-Chevalier, J. *et al.* A dynamic CTCF chromatin binding landscape promotes DNA hydroxymethylation and transcriptional induction of adipocyte differentiation. *Nucleic Acids Res.* **42**, 10943–10959 (2014).
7. Zampieri, M. *et al.* ADP-ribose polymers localized on Ctfc–Parp1–Dnmt1 complex prevent methylation of Ctfc target sites. *Biochem. J.* **441**, 645–652 (2012).
8. Yin, Y. *et al.* Impact of cytosine methylation on DNA binding specificities of human transcription factors. *Science* **356**, eaaj2239 (2017).
9. Spruijt, C. G. *et al.* Dynamic Readers for 5-(Hydroxy)Methylcytosine and Its Oxidized Derivatives. *Cell* **152**, 1146–1159 (2013).
10. Bartke, T. *et al.* Nucleosome-Interacting Proteins Regulated by DNA and Histone Methylation. *Cell* **143**, 470–484 (2010).
11. Takahashi, K. & Yamanaka, S. Induction of Pluripotent Stem Cells from Mouse Embryonic and Adult Fibroblast Cultures by Defined Factors. *Cell* **126**, 663–676 (2006).

12. Soufi, A. *et al.* Pioneer Transcription Factors Target Partial DNA Motifs on Nucleosomes to Initiate Reprogramming. *Cell* **161**, 555–568 (2015).
13. Chronis, C. *et al.* Cooperative Binding of Transcription Factors Orchestrates Reprogramming. *Cell* **168**, 442–459.e20 (2017).
14. Sardina, J. L. *et al.* Transcription Factors Drive Tet2-Mediated Enhancer Demethylation to Reprogram Cell Fate. *17* (2018).
15. Soufi, A., Donahue, G. & Zaret, K. S. Facilitators and Impediments of the Pluripotency Reprogramming Factors' Initial Engagement with the Genome. *Cell* **151**, 994–1004 (2012).
16. Hu, S. *et al.* DNA methylation presents distinct binding sites for human transcription factors. *eLife* **2**, e00726 (2013).
17. Domcke, S. *et al.* Competition between DNA methylation and transcription factors determines binding of NRF1. *Nature* **528**, 575–579 (2015).
18. Perera, A. *et al.* TET3 Is Recruited by REST for Context-Specific Hydroxymethylation and Induction of Gene Expression. *Cell Rep.* **11**, 283–294 (2015).
19. Swinstead, E. E. *et al.* Steroid Receptors Reprogram FoxA1 Occupancy through Dynamic Chromatin Transitions. *Cell* **165**, 593–605 (2016).
20. Dumasia, K., Kumar, A., Deshpande, S. & Balasinor, N. H. Estrogen signaling, through estrogen receptor  $\beta$ , regulates DNA methylation and its machinery in male germ line in adult rats. *Epigenetics* **12**, 476–483 (2017).
21. Thomassin, H. Glucocorticoid-induced DNA demethylation and gene memory during development. *EMBO J.* **20**, 1974–1983 (2001).
22. Cirillo, L. A. *et al.* Opening of Compacted Chromatin by Early Developmental Transcription Factors HNF3 (FoxA) and GATA-4. *Mol. Cell* **9**, 279–289 (2002).
23. Huang, P. *et al.* Induction of functional hepatocyte-like cells from mouse fibroblasts

- by defined factors. *Nature* **475**, 386–389 (2011).
24. Sekiya, S. & Suzuki, A. Direct conversion of mouse fibroblasts to hepatocyte-like cells by defined factors. *Nature* **475**, 390–393 (2011).
  25. Lea, A. J. *et al.* Genome-wide quantification of the effects of DNA methylation on human gene regulation. *eLife* **7**, e37513 (2018).
  26. Suzuki, T. *et al.* A screening system to identify transcription factors that induce binding site-directed DNA demethylation. *Epigenetics Chromatin* **10**, 60 (2017).
  27. Tsankov, A. M. *et al.* Transcription factor binding dynamics during human ES cell differentiation. *Nature* **518**, 344–349 (2015).
  28. Lee, M. T. *et al.* Nanog, Pou5f1 and SoxB1 activate zygotic gene expression during the maternal-to-zygotic transition. *Nature* **503**, 360–364 (2013).
  29. Costa, Y. *et al.* NANOG-dependent function of TET1 and TET2 in establishment of pluripotency. *Nature* **495**, 370–374 (2013).
  30. Boulay, G. *et al.* OTX2 Activity at Distal Regulatory Elements Shapes the Chromatin Landscape of Group 3 Medulloblastoma. 15.
  31. Budry, L. *et al.* The selector gene Pax7 dictates alternate pituitary cell fates through its pioneer action on chromatin remodeling. *Genes Dev.* **26**, 2299–2310 (2012).
  32. Mayran, A. *et al.* Pioneer factor Pax7 deploys a stable enhancer repertoire for specification of cell fate. *Nat. Genet.* **50**, 259–269 (2018).
  33. McKinnell, I. W. *et al.* Pax7 activates myogenic genes by recruitment of a histone methyltransferase complex. *Nat. Cell Biol.* **10**, 77–84 (2008).
  34. Velychko, S. *et al.* Excluding Oct4 from Yamanaka Cocktail Unleashes the Developmental Potential of iPSCs. *Cell Stem Cell* **25**, 737-753.e4 (2019).
  35. Adam, R. C. *et al.* Pioneer factors govern super-enhancer dynamics in stem cell plasticity and lineage choice. *Nature* **521**, 366–370 (2015).

36. Gaston, K. & Fried, M. CpG methylation has differential effects on the binding of YY1 and ETS proteins to the bi-directional promoter of the Surf-1 and Surf-2 genes. *9*.
37. Cirillo, L. A. & Zaret, K. S. An Early Developmental Transcription Factor Complex that Is More Stable on Nucleosome Core Particles Than on Free DNA. *Mol. Cell* **4**, 961–969 (1999).
38. Cirillo, L. A. Binding of the winged-helix transcription factor HNF3 to a linker histone site on the nucleosome. *EMBO J.* **17**, 244–254 (1998).
39. Zhang, Y. Nucleation of DNA repair factors by FOXA1 links DNA demethylation to transcriptional pioneering. *Nat. Genet.* **48**, 13 (2016).
40. Donaghey, J. *et al.* Genetic determinants and epigenetic effects of pioneer-factor occupancy. *Nat. Genet.* **50**, 250–258 (2018).
41. Yang, Y. A. *et al.* FOXA1 potentiates lineage-specific enhancer activation through modulating TET1 expression and function. *Nucleic Acids Res.* **44**, 8153–8164 (2016).
42. Xu, J. *et al.* Transcriptional competence and the active marking of tissue-specific enhancers by defined transcription factors in embryonic and induced pluripotent stem cells. *Genes Dev.* **23**, 2824–2838 (2009).
43. Lukoseviciute, M. *et al.* From Pioneer to Repressor: Bimodal foxd3 Activity Dynamically Remodels Neural Crest Regulatory Landscape In Vivo. *Dev. Cell* **47**, 608–628.e6 (2018).
44. Zhang, X. *et al.* Genome-wide analysis of cAMP-response element binding protein occupancy, phosphorylation, and target gene activation in human tissues. *Proc. Natl. Acad. Sci.* **102**, 4459–4464 (2005).
45. Mann, I. K. *et al.* CG methylated microarrays identify a novel methylated sequence bound by the CEBPB ATF4 heterodimer that is active in vivo. *Genome Res.* **23**, 988–997 (2013).

46. Kovesdi, I., Reichel, R. & Nevins, J. R. Role of an adenovirus E2 promoter binding factor in E1A-mediated coordinate gene control. *Proc Natl Acad Sci USA* **5** (1987).
47. Campanero, M. R., Armstrong, M. I. & Flemington, E. K. CpG methylation as a mechanism for the regulation of E2F activity. *Proc. Natl. Acad. Sci.* **97**, 6481–6486 (2000).
48. Robertson, K. D. *et al.* DNMT1 forms a complex with Rb, E2F1 and HDAC1 and represses transcription from E2F-responsive promoters. *Nat. Genet.* **25**, 338–342 (2000).
49. Perini, G., Diolaiti, D., Porro, A. & Della Valle, G. In vivo transcriptional regulation of N-Myc target genes is controlled by E-box methylation. *Proc. Natl. Acad. Sci.* **102**, 12117–12122 (2005).
50. Barski, A. *et al.* High-Resolution Profiling of Histone Methylations in the Human Genome. *Cell* **129**, 823–837 (2007).
51. Chen, X. *et al.* Integration of External Signaling Pathways with the Core Transcriptional Network in Embryonic Stem Cells. *Cell* **133**, 1106–1117 (2008).
52. Welboren, W.-J. *et al.* ChIP-Seq of ER $\alpha$  and RNA polymerase II defines genes differentially responding to ligands. *EMBO J.* **28**, 1418–1428 (2009).
53. Jolma, A. *et al.* DNA-Binding Specificities of Human Transcription Factors. *Cell* **152**, 327–339 (2013).
54. Wei, G.-H. *et al.* Genome-wide analysis of ETS-family DNA-binding in vitro and in vivo. *EMBO J.* **29**, 2147–2160 (2010).
55. The ENCODE Project Consortium. An integrated encyclopedia of DNA elements in the human genome. *Nature* **489**, 57–74 (2012).
56. Respuela, P. *et al.* Foxd3 Promotes Exit from Naive Pluripotency through Enhancer Decommissioning and Inhibits Germline Specification. *Cell Stem Cell* **18**, 118–133

(2016).

57. Ang, Y.-S. *et al.* Disease Model of GATA4 Mutation Reveals Transcription Factor Cooperativity in Human Cardiogenesis. *Cell* **167**, 1734-1749.e22 (2016).
58. Blattler, A. *et al.* ZBTB33 binds unmethylated regions of the genome associated with actively expressed genes. *Epigenetics Chromatin* **6**, 13 (2013).
59. Balwiercz, P. J. *et al.* ISMARA: automated modeling of genomic signals as a democracy of regulatory motifs. *Genome Res.* **24**, 869–884 (2014).
60. Oldfield, A. J. *et al.* Histone-Fold Domain Protein NF-Y Promotes Chromatin Accessibility for Cell Type-Specific Master Transcription Factors. *Mol. Cell* **55**, 708–722 (2014).
61. Berger, M. F. *et al.* Variation in Homeodomain DNA Binding Revealed by High-Resolution Analysis of Sequence Preferences. *Cell* **133**, 1266–1276 (2008).
62. Samuel, A., Housset, M., Fant, B. & Lamonerie, T. Otx2 ChIP-seq Reveals Unique and Redundant Functions in the Mature Mouse Retina. *PLoS ONE* **9**, e89110 (2014).
63. Johnson, D. S., Mortazavi, A., Myers, R. M. & Wold, B. Genome-Wide Mapping of in Vivo Protein-DNA Interactions. *Science* **316**, 1497–1502 (2007).
64. Kanai, Y. *et al.* Identification of Two Sox17 Messenger RNA Isoforms, with and without the High Mobility Group Box Region, and Their Differential Expression in Mouse Spermatogenesis. *J. Cell Biol.* **133**, 15 (1996).
65. Liu, C.-F. & Lefebvre, V. The transcription factors SOX9 and SOX5/SOX6 cooperate genome-wide through super-enhancers to drive chondrogenesis. *Nucleic Acids Res.* **43**, 8183–8203 (2015).
66. Badis, G. *et al.* Diversity and Complexity in DNA Recognition by Transcription Factors. **324**, 5 (2009).
